# Supplementary material for: Genomic profiling and expression analysis of the diacylglycerol kinase gene family in heterologous hexaploid wheat
Source: PeerJ. 2021 Dec 14;9:e12480. doi: 10.7717/peerj.12480 (PMC8679913; doi:10.7717/peerj.12480)
Supplement: Supplemental Information 8 [file peerj-09-12480-s008.xlsx]

## Sheet: molecular function
Table S1A Gene Ontololgy(GO) molecular function
GO molecular function complete	Number	GO ID	Fold Enrichment	P-value	FDR	-log10 (FDR)
diacylglycerol kinase activity	24	GO:0004143	> 100	1.02e-83	2.41e-80	79.618
NAD+ kinase activity	24	GO:0003951	> 100	2.5e-77	2.95e-74	73.5302
phosphotransferase activity, alcohol group as acceptor	24	GO:0016773	17.13	2.56e-30	2.01e-27	26.6968
kinase activity	24	GO:0016301	16.49	6.39e-30	3.78e-27	26.4225
transferase activity, transferring phosphorus-containing groups	24	GO:0016772	14.88	7.5e-29	3.54e-26	25.451
ATP binding	24	GO:0005524	11.39	4.54e-26	1.79e-23	22.7471
adenyl nucleotide binding	24	GO:0030554	11.18	7.12e-26	2.1e-23	22.6778
adenyl ribonucleotide binding	24	GO:0032559	11.22	6.55e-26	2.21e-23	22.6556
purine ribonucleoside triphosphate binding	24	GO:0035639	10.64	2.3e-25	6.03e-23	22.2197
purine ribonucleotide binding	24	GO:0032555	10.49	3.23e-25	7.64e-23	22.1169
purine nucleotide binding	24	GO:0017076	10.44	3.67e-25	7.89e-23	22.1029
ribonucleotide binding	24	GO:0032553	10.33	4.68e-25	9.21e-23	22.0357
carbohydrate derivative binding	24	GO:0097367	10.22	6.09e-25	1.11e-22	21.9547
nucleoside phosphate binding	24	GO:1901265	9.35	5.13e-24	8.09e-22	21.0921
nucleotide binding	24	GO:0000166	9.35	5.13e-24	8.66e-22	21.0625
anion binding	24	GO:0043168	9.1	9.77e-24	1.44e-21	20.8416
small molecule binding	24	GO:0036094	8.91	1.65e-23	2.29e-21	20.6402
transferase activity	24	GO:0016740	6.85	8.99e-21	1.18e-18	17.9281
ion binding	24	GO:0043167	5.02	1.54e-17	1.92e-15	14.7167
organic cyclic compound binding	24	GO:0097159	4.24	8.97e-16	1.01e-13	12.9957
heterocyclic compound binding	24	GO:1901363	4.24	8.62e-16	1.02e-13	12.9914
catalytic activity	24	GO:0003824	3.01	3.41e-12	3.66e-10	9.43652
binding	24	GO:0005488	2.98	4.2e-12	4.31e-10	9.36552
Annotation Version and Release Date: GO Ontology database DOI: 10.5281/zenodo.4735677 Released 2021-05-01

## Sheet: biological process
Table S1B Gene Ontololgy(GO) biological process
GO biological process complete	Number	GO ID	Fold Enrichment	P-value	FDR	-log10 (FDR)
protein kinase C-activating G protein-coupled receptor signaling pathway	24	GO:0007205	> 100	1.02e-83	4.07e-80	79.3904
G protein-coupled receptor signaling pathway	24	GO:0007186	> 100	1.03e-76	2.06e-73	72.6861
defense response	24	GO:0006952	64.52	4.45e-44	5.92e-41	40.2277
signal transduction	24	GO:0007165	33.57	2.61e-37	2.61e-34	33.5834
signaling	24	GO:0023052	32.93	4.15e-37	3.32e-34	33.4789
cell communication	24	GO:0007154	28.19	1.71e-35	1.14e-32	31.9431
response to stress	24	GO:0006950	21.91	7.07e-33	4.04e-30	29.3936
cellular response to stimulus	24	GO:0051716	18.6	3.57e-31	1.78e-28	27.7496
phosphorylation	24	GO:0016310	16.31	8.35e-30	3.71e-27	26.4306
response to stimulus	24	GO:0050896	12.1	1.07e-26	4.26e-24	23.3706
phosphate-containing compound metabolic process	24	GO:0006796	12.05	1.17e-26	4.25e-24	23.3716
phosphorus metabolic process	24	GO:0006793	11.93	1.49e-26	4.96e-24	23.3045
regulation of cellular process	24	GO:0050794	9.06	1.1e-23	3.39e-21	20.4698
regulation of biological process	24	GO:0050789	8.37	7.36e-23	2.1e-20	19.6778
biological regulation	24	GO:0065007	7.3	1.92e-21	5.11e-19	18.2916
cellular metabolic process	24	GO:0044237	3.68	2.68e-14	6.69e-12	11.1746
metabolic process	24	GO:0008152	3.16	1.02e-12	2.39e-10	9.6216
intracellular signal transduction	9	GO:0035556	36.8	1.41e-12	3.12e-10	9.50585
cellular process	24	GO:0009987	2.62	8.81e-11	1.85e-08	7.73283
biological_process	24	GO:0008150	1.96	1.31e-07	2.49e-05	4.6038
Annotation Version and Release Date: GO Ontology database DOI: 10.5281/zenodo.4735677 Released 2021-05-01
