# Supplementary material for: Genomic profiling and expression analysis of the diacylglycerol kinase gene family in heterologous hexaploid wheat
Source: PeerJ. 2021 Dec 14;9:e12480. doi: 10.7717/peerj.12480 (PMC8679913; doi:10.7717/peerj.12480)
Supplement: Supplemental Information 9 [file peerj-09-12480-s009.xlsx]

## Sheet: Sheet1
Table S2 Primers used for subcellular localization and quantitative real-time PCR analyses.
Gene name	Primer sequences for quantitative real-time PCR analyses	Primer sequences for subcellular location
TaDGK1	TaDGK1-qF: 5'-GCGATACCGCACCATATTCTA-3'	TaDGK2A-F: 5'-GGACTAGT ATGGACTGCAGGATGGACG-3'
	TaDGK1-qR: 5'-AGCAGGCAGGTCAGTCAACAC-3'	TaDGK2A-R: 5'-CCGGTACC GCTAAGATGCGCAATGTCG-3'
TaDGK5	TaDGK5-qF: 5'-GGGTCTCCAATTTGGTACTGTATG-3'	TaDGK3A-F: 5'-GCTCTAGA ATGGAGAACAGTTTCGAGAAA-3'
	TaDGK5-qR: 5'-AAGTCCTGTTGCACCTGTCCTAT-3'	TaDGK3A-R: 5'-CCGGTACCAGCTTCTACTGTTTTTTTCACATC-3'
TaDGK6	TaDGK6-qF: 5'-TGCCAGAGGGAGAAATAACAGA-3'	TaDGK5B-F: 5'-GTCGAC ATGCACAGGATGGCGCTT-3'
	TaDGK6-qR: 5'-CATCCATCCCAATGCTAAGGTA-3'	TaDGK5B-R: 5'-ACTAGTCAAAAGCCTAGACGCTATCTCC-3'
TaDGK7	TaDGK7-qF: 5'-TGCCAGAAGAAGGAGAAGAACA-3'	TaDGK5A2-F: 5'-TCTAGAATGGACCTGGTGGGATCA-3'
	TaDGK7-qR: 5'-AAATCCGTAAGCCACTTGAGC-3'	TaDGK5A2-R: 5'-GGTACCGGAGGATAAACGGAGTGCTATC-3'
TaDGK7-2	TaDGK7-2-qF: 5'-AGGAGACATTCTTGCCGTTCA-3'
	TaDGK7-2-qR: 5'-TTGTTTCCAGTTCCCAGAGGTA-3'
TaDGK6-2	TaDGK6-2-qF: 5'-ACTGAATCTTCCTCACTCCCTTAG-3'
	TaDGK6-2-qR: 5'CCACTTGAGCATCCATCCCTA-3'
TaDGK2A	TaDGK2A-qF: 5'-CCTGTTGCTACTGTGCCTCTG-3'
	TaDGK2A-qR: 5'-CGCATTTCTCTTGCTCCTTT-3'
TaDGK3A	TaDGK3A-qF: 5'-GGGAACACCAAGTAAGAGGAAG-3'
	TaDGK3A-qR: 5'-CGGAGATAACAAAACAAGGCC-3'
TaDGK5B	TaDGK4B-qF: 5'-CAACACTGCTAAGAGAGATGATCAT-3'
	TaDGK4B-qR: 5'-CTGTTTGTCTTTTTCTGATTCAGTG-3'
TaDGK5A2	TaDGK5A-qF: 5'-TGAGGAGGCCATCTGAAGAG-3'
	TaDGK5A-qR: 5'-ACCATTGCACTCAGCGTTC-3'
DREB2	DREB2-qF: 5'-CACAGGTGGAGATGGTGTTC-3'
	DREB2-qR: 5'-GGAAATCAAGGTGTTGTACGC-3'
Actin	Actin-qF: 5'-TTCCAGCCATCTTTCATTG-3'
	Actin-qR: 5'-CTTCATGCTGCTTGGTGC-3'
