# Supplementary material for: Genomic profiling and expression analysis of the diacylglycerol kinase gene family in heterologous hexaploid wheat
Source: PeerJ. 2021 Dec 14;9:e12480. doi: 10.7717/peerj.12480 (PMC8679913; doi:10.7717/peerj.12480)
Supplement: Supplemental Information 10 [file peerj-09-12480-s010.xlsx]

## Sheet: Sheet1
Table S3 Nucleic acid, deduced amino acid, promoter, and genomic sequences of TaDGKgenes.
Gene name	Category	Sequence
TaDGK1A	Nucleic acid sequence	ATGGACTGGTTGAAGGATCAATTAAACATGTTTATGTTCAGTTTATACAGTGAATCTCCTAAACCATCAGAATTCTGGATCCCCATTGCTGCATACCTCACTGTTGGTATACTCAGTCTTTTGATGTTTTTGTACCTCTTCTCGTTGTGGAGGCGAAAGATCAGTGTAAGCTGGATGAAAGTGATCGCCCGGTCAAAAAGGAGAAACTTCGAGAGAAATCAAAAGGTCCCTACTGCTGAACATATATGGTCTGCAGAATCTCTACTTCGTGCAAAAGGACTGAGGTGCTGTGTGTGCCTAGAATCTATTACACCTGCTCAGCCCCTTGGGACAGTGATAACATCAGAGAACATGGTTCACCGCTGTGATGTTTGTGGTGCCGCTGCGCACACGATCTGC…
	Deduced amino acid sequence	MDWLKDQLNMFMFSLYSESPKPSEFWIPIAAYLTVGILSLLMFLYLFSLWRRKISVSWMKVIARSKRRNFERNQKVPTAEHIWSAESLLRAKGLRCCVCLESITPAQPLGTVITSENMVHRCDVCGAAAHTICSSYSQRDCKCVSLLGWKHVVHQWTVLWTDIADQPEEAQYCSYCEEPCNGSFLGGPIYCCMWCQRLVHVDCHSSMSTETGDVCDLGPFRRLILSPLHVGAKNKPGGILSSITQGANELASTVRGHLRNRGKRQKYDKRLSSDSMAGESNDDSSSDTAPYSNQRAKELKTNVGSVQRHAENEHDSSESDCKEVVSEPRRLHNDDTGGAKLKYVLTDLPADARPLLVFINKRSGAQRGDSLKHRLHFLLNPVQVFELSSSQGPEAGLLL…
	Promoter sequence	CCTTGCTGGTCTCCTCGAGTTGGCGGAGAGAAGAAAAGAAGGAAACACGCCAGATTTCAGAGAGAGAGAGAGAGAAGGAAACACGCCATGGAGTCCGGAGCGGAGACGTCGTGAAGTATTGAGTTTCGTACGTCGGCGGCGGCGGCGGCGGCTCGAGGGCAAGGTGGGTCGGAGCTTCTCGCCTGATTCATGGCGTAAGTTGATATGGGCTTTGGTATCGATTCCCTTTTCTCTTTCAAGTTCTTGTGGAAATCTCGTGCAGAATTGGCATCCTAACTTTATTTCGGCGGACCTATTTTATCAGAGTTTAGGCTTTCCCCCGCTCCCTCTAATCACAAGTTCGAACCCACCCGATTTCCTTTCTTCCCTTCAGACTCCAGTTCATGCAAAAATAAGAAC…
	Genomic sequence	ATGGACTGGTTGAAGGATCAATTAAACATGTTTATGTTCAGTTTATACAGTGAATCTCCTAAACCATCAGAATTCTGGATCCCCATTGCTGCATACCTCACTGTTGGTATACTCAGTCTTTTGATGTTTTTGTACCTCTTCTCGTTGTGGAGGCGAAAGATCAGTGTAAGCTGGATGAAAGTGATCGCCCGGTCAAAAAGGAGAAACTTCGAGAGAAATCAAAAGGTCCCTACTGCTGAACATATATGGTCTGCAGAATCTCTACTTCGTGCAAAAGGACTGAGGTGCTGTGTGTGCCTAGAATCTATTACACCTGCTCAGCCCCTTGGGACAGTGATAACATCAGAGAACATGGTTCACCGCTGTGATGTTTGTGGTGCCGCTGCGCACACGATCTGC…
TaDGK1B	Nucleic acid sequence	ATGGACTGGTTGAAGGAACAATTTAAAATGTTTATGTTCAGTTTGTACAGTGAATCTCCTAATCCATCAGAATTCTGGATCCCCATTGCTGCATACCTCACTGTTGGTATACTCAGTCTTTTGGTGCTTTTGTACCTCTTCTCGCTGTGGAGGCGAAAGATCAGTGTAAGCTGGATGAAAGTGATCGCCCGGTCAAAAAGGAGAAACTTCGAAAGAAATCAAAAGGTCCCTACTGCTGAACATATATGGTCTGCAGAATCTCTACTTCGTGCAAAAGGACTGAGGTGCTGTGTGTGCCTAGAATCTATTACACCTGCTCAGCCCCTTGGGACAGTGATAACATCAGATAACATGGTTCACCGCTGCGATGTTTGTGGTGCCGCTGCGCACACGATCTGC…
	Deduced amino acid sequence	MDWLKEQFKMFMFSLYSESPNPSEFWIPIAAYLTVGILSLLVLLYLFSLWRRKISVSWMKVIARSKRRNFERNQKVPTAEHIWSAESLLRAKGLRCCVCLESITPAQPLGTVITSDNMVHRCDVCGAAAHTICSSNSQRDCKCVSLLGWKHVVHQWTVLWTDIADQPEEAQYCSYCEEPCNGSFLGGPIYCCMWCQRLVHVDCHSSMSTETGDVCDLGPFRRLILSPLHVGAKNKPGGILSSITQGANELASTVRGHLRNRGKRQKCDKRLSSDSMAGESNDDSSSDTAPYSNQRAKELKTNVGSVQRHAENEHDSSESDCKEVISEPRRLHNDDTGGAKLKYVLTDLPADARPLLVFINKRSGAQRGDSLKHRLHFLLNPVQVFELSSSQGPEAGLSL…
	Promoter sequence	CGCGCGATGGAGTTGCCGTGTCCGGCATACGTGGCCCTCTGGAGCGACACGTGTCGGCACCCGCCTCATTTCCCTCTGCCCGATTCTCTTCGCTTTTCTATTCCTCTGCGGTTCCTTGCTGGTCTCCTCGAGTTGGCGGAGAGAAGAAAAGAAGGAAACACGCCAGATTTCAAAGAGAGAGAGGGAGAGAAGGAAACACGCCATGGAGTCCGGAGGGGAGACGTCGTGAAGTATCGAGTTTCCTACGTCGGCGGCGGCTCGAGGGCAAGGTGGGTCGGAGCTTCTCGCCTGATTCATGGCCTAAGTGGATATGGGCTTTGGTATCGATTCCCTTTTCTCTTTCAAGTTCTTGCGGAAATCTCGTACAGAGTTGGCGTCCTAACTTTATTTCAGCGGACC…
	Genomic sequence	ATGGACTGGTTGAAGGAACAATTTAAAATGTTTATGTTCAGTTTGTACAGTGAATCTCCTAATCCATCAGAATTCTGGATCCCCATTGCTGCATACCTCACTGTTGGTATACTCAGTCTTTTGGTGCTTTTGTACCTCTTCTCGCTGTGGAGGCGAAAGATCAGTGTAAGCTGGATGAAAGTGATCGCCCGGTCAAAAAGGAGAAACTTCGAAAGAAATCAAAAGGTCCCTACTGCTGAACATATATGGTCTGCAGAATCTCTACTTCGTGCAAAAGGACTGAGGTGCTGTGTGTGCCTAGAATCTATTACACCTGCTCAGCCCCTTGGGACAGTGATAACATCAGATAACATGGTTCACCGCTGCGATGTTTGTGGTGCCGCTGCGCACACGATCTGC…
TaDGK1D	Nucleic acid sequence	ATGGACTGGTTGAAGGAACAATTTGACATGTTTATGTTCAGTTTGTACAGTGAATCTCCTAATCCATCAGAATTCTGGATCCCCATTGCTGCATACCTCACTGTTGGTATTGTCAGTCTTTTGATGTTTTTGTACCTATTCTCGCTGTGGAGGCGAAAGATCAGTGTAAGCTGGATGAAAGTGATTGCCCGGTCAAAAAGGAGAAACTTCGAAAGAAATCAAAAGGTCCCTACTGCTGAACATATATGGTCTGCAGAATCTCTACTTCGTGCAAAAGGACTGAGGTGCTGTGTGTGCCTAGAATCTATTACACCTGCTCAGCCCCTTGGGACAGTGATAACATCAGAGAACATGGTTCACCGCTGTGATGTTTGTGGTGCCGCTGCGCACACTATCTGC…
	Deduced amino acid sequence	MDWLKEQFDMFMFSLYSESPNPSEFWIPIAAYLTVGIVSLLMFLYLFSLWRRKISVSWMKVIARSKRRNFERNQKVPTAEHIWSAESLLRAKGLRCCVCLESITPAQPLGTVITSENMVHRCDVCGAAAHTICSSNSQRDCKCVSLLGWKHVVHQWTVLWTDIADQPEEAQYCSYCEEPCNGSFLGGPIYCCMWCQRLVHVDCHSSMSTETGDVCDLGPFRRLILSPLHVGAKNKPGGILSSITQGANELASTVRGHLRNRGKRQKYDKRLSSDSMAGESNDDSSSDTAPYSNQRAKELKSNVGSVQRHAENEHDSSESDCKEVVSEPRRLHNDDTGGAKLKYVLTDLPADARPLLVFINKRSGAQHGDSLKHRLHFLLNPVQVFELSSSQGPEAGLLL…
	Promoter sequence	GTGTCGGCACCCGCCTCATTTCCCTCTGCCCGATTCTCTTCGCTTTTCTATTCATCTGCGGTTCCTTGCTGGTCTCCTCGAGTTGGCGGACAGAAGAAAAGAAGGAAACACGCCAGATTTCAGAGAGAGAGAGAGAGACAAGGAAACACGCCATGGAGTCCGGAGGGGAGACGTCGTGAAGTACTGAGTTTCGTACGTCGGCGGCGGTGGCGGCGGCTCGAGGGCAAGGTGGGTCGGAGCTTCTCGCCTGATTCATGGCGTAAGTTGATACGGGCTTTGGTATCGATTCCCCTTCTTTTTTTCAGTTCTTGCGGAAATCTCGTGCAGAGTTGGCGTCCTAACTTTATTTCAGCGGACCTATTTTATCAGAGTTTAGGCTTCCCCCCTCTCCCTCTAATC…
	Genomic sequence	ATGGACTGGTTGAAGGAACAATTTGACATGTTTATGTTCAGTTTGTACAGTGAATCTCCTAATCCATCAGAATTCTGGATCCCCATTGCTGCATACCTCACTGTTGGTATTGTCAGTCTTTTGATGTTTTTGTACCTATTCTCGCTGTGGAGGCGAAAGATCAGTGTAAGCTGGATGAAAGTGATTGCCCGGTCAAAAAGGAGAAACTTCGAAAGAAATCAAAAGGTCCCTACTGCTGAACATATATGGTCTGCAGAATCTCTACTTCGTGCAAAAGGACTGAGGTGCTGTGTGTGCCTAGAATCTATTACACCTGCTCAGCCCCTTGGGACAGTGATAACATCAGAGAACATGGTTCACCGCTGTGATGTTTGTGGTGCCGCTGCGCACACTATCTGC…
TaDGK2A	Nucleic acid sequence	ATGGACGGATGCGCAATTGGTTCTAACGGTTCTGGCAGCAAGTCATGCGGCCCGCTGTCGGACTACCGCATTCCAGATTACATACTAAAGCCGGACTCTGAACCAGTCATCCTTGACAATGCACCATCTTGTCCCGTGGTAGTCTTCATCAACTCTAGAAGCGGTGGCCAACTTGGAAGTGGTTTGATCAAATCATACCGTGAAGTTCTCAATGAAGCACAGGTCTTTGATCTGTCTGAGGAGTCCCCTGACAAGGTGCTGCACAGGTTGTATGCCAACTTCCAAAGGCTCAAGTCCAATGGTGACACTCTTGCTATTCAAATTGAGAAGAGCCTGAGACTAATTGTTGCTGGTGGTGATGGCACGGCAAGTTGGCTGCTTGGAGTAGTTAGTGATCTG…
	Deduced amino acid sequence	MDGCAIGSNGSGSKSCGPLSDYRIPDYILKPDSEPVILDNAPSCPVVVFINSRSGGQLGSGLIKSYREVLNEAQVFDLSEESPDKVLHRLYANFQRLKSNGDTLAIQIEKSLRLIVAGGDGTASWLLGVVSDLKLTHSPPVATVPLGTGNNLPFSFGWGKKNPATDQEAVKSFLGLVKGAREMRIDSWHIIMRMRVPQEGPCDPIAPLELPHSLHAFHRVTGSDELNVEGYHTFRGGFWNYFSMGMDAQVSYGFHSERKKNPEKFKNQLTNQGTYAKLGLKQGWFAPSLTHSSSRNISQLAKVKIMKIGGKWEELKIPSSIRSIICLNLPSFSGGFNPWGTPGTRKKQDRDLTAPYVDDGLIEVVGFRDAWHGLVLLAPNGHGTRLAQAHRIRFEFHKG…
	Promoter sequence	CCCCTATTAGTACCCCCGCTCCCACCAAGAATCTCCCCCAACTCCTCCCTCCTCGGTCTCCGGCCAGTCCACCCACCGAATCCGCCGGACGCGCCCAGCCTGCCCCGCCACCAGGTAAAGATCCGCCGCCGCCCACCTAGCTTCTTGAATGTTGCGAGGGGATCCCTCGCCTGCAGATATTTTCTTTTCTTTTCTTTCTTTCCCGGGTCGTTGTCCCCGCATTCCGGTCGCCGGAATTCGATCCTGCTGTCGGTGCTCGCTGCATCTCTCCCTCTCTCTCTAGCGCTCTAGATCCACGCGCGGCGGTTACCTGGGTGATGCCGTGTGGCTGCGGGTTGGGGATCTGGTTCTTTCTTCCGCGCAGGGCTTCAGTTGCCGGGCCTTTTCTTTTCTACACGG…
	Genomic sequence	ATGGACGGATGCGCAATTGGTTCTAACGGTTCTGGCAGCAAGTCATGCGGCCCGCTGTCGGACTACCGCATTCCAGATTACATACTAAAGCCGGACTCTGAACCAGTCATCCTTGACAATGCACCATCTTGTCCCGTGGTAGTCTTCATCAACTCTAGAAGCGGTGGCCAACTTGGAAGTGGTTTGATCAAATCATACCGTGAAGTTCTCAATGAAGCACAGGTACCTGGCTTGCAGTTGCAGAATCTGTGATGCTGAAACAGTGCATTCCATTGGTCCCTTGATACACAGTAGCTCTTTAAATCATGTTTGATTGCTGGGGAAATTTACATCATTCACCTTTTCACAGGTCTTTGATCTGTCTGAGGAGTCCCCTGACAAGGTGCTGCACAGGTTGTA…
TaDGK2B	Nucleic acid sequence	ATGGACGGATGTGCGATTAGCACTAACGGTTCTGGCAGCAAGTCATGCGGGCCGCTGTCGGACTACCACATTCCAGACTACATACTAAAGCCAGACTCTGAACCAGTCATCATTGATAATGCACCAATTTGTCCCGTGGTGGTCTTCATCAACTCTAGAAGCGGTGGCCAACTTGGAAGTGGTTTGATCAAATCATACCGTGAAGTTCTCAATGAAGCACAGGTTTTTGATCTCTCTGAAGAGTCCCCTGACAAGGTGCTGCACAGGTTGTATGCCAACTTTCAAAGGCTAAAGTCTAACGGTGACCCTCTTGCTATTCAAATTGAGAAGAGCCTGAGACTAATTGTTGCTGGTGGTGATGGCACCGCAAGTTGGCTGCTTGGAGTAGTTAGTGATCTG…
	Deduced amino acid sequence	MDGCAISTNGSGSKSCGPLSDYHIPDYILKPDSEPVIIDNAPICPVVVFINSRSGGQLGSGLIKSYREVLNEAQVFDLSEESPDKVLHRLYANFQRLKSNGDPLAIQIEKSLRLIVAGGDGTASWLLGVVSDLKLMHSPPVATVPLGTGNNLPFSFGWGKKNPATDKEAVKSFLGLVKEAREMSIDSWHIIMRMRVPQEGPCDPIAPLELPHSLHAFHRVTGADELNVEGYHTFRGGFWNYFSMGMDAQVSYGFHSERKKNPEKFKNQLTNQGTYAKLGLKQGWFAPSLTHSSSRNISQLAKVKIMKRPGAKWEELKIPSSIRSIICLNLPSFSGGFNPWGTPGTRKKQDRDLTAPYVDDGLIEVVGFRDAWHGLVLLAPNGHGTRLAQAHRIRFEFHK…
	Promoter sequence	TGGGACGTTGCGGACTTGGACAAACTGCTGACGCCCGCCTCCCCACTCCATGATGAACCGCAGGCCAGGACCGGGGGTCGTTTTCCTCTGCTCTTTCCTCGCCGTCCTCGCCCGCCCGCTCGGCGCTCGCCGCCACCACCACCATCCCAAGCACCCCAACCCCGAATCCACTCGCCCCCACTCCCCTATTAGTACCCCCGCTCCCACGAAGAATCTCCCCCAACTCCTCCCCCCTCGGTCTCCGGGCAGTCCATCCACCGAATCCGCCGGACGCGCCGAGCCTCCCCCGACCTTTCCGAACCCGCCGGGCAGTCCAGGTAAAGATCCACGGCCGGCCACCGACCACTCTGAATCTTGCGAGGGGATCTTTTGCCCGGAGATATTTTCTTTTCTTGGGTC…
	Genomic sequence	ATGGACGGATGTGCGATTAGCACTAACGGTTCTGGCAGCAAGTCATGCGGGCCGCTGTCGGACTACCACATTCCAGACTACATACTAAAGCCAGACTCTGAACCAGTCATCATTGATAATGCACCAATTTGTCCCGTGGTGGTCTTCATCAACTCTAGAAGCGGTGGCCAACTTGGAAGTGGTTTGATCAAATCATACCGTGAAGTTCTCAATGAAGCACAGGTACCTGGCCTAGCAGTTGCAGAAGCTGTGATGCTGAAACAGTGCATTACTTTGATCCCTTGATCTGCAGTAGCTCTTTAAATCATGTTCTGATTGCTGGGGAGATTTACATCATTCACCTTTTCACAGGTTTTTGATCTCTCTGAAGAGTCCCCTGACAAGGTGCTGCACAGGTTG…
TaDGK2D	Nucleic acid sequence	ATGGACGGATGTGCAATTGGTTCTAACGGTTCTGGCAGCAAGTCATGCGGGCCGCTGTCGGACTACCGCATTCCAGACTACATACTAAAGCCGGACTCTGAACGGGTCATCGTTGATAATGCACCATCTTGTCCCGTGGTAGTCTTCATCAACTCTAGAAGCGGTGGCCAACTTGGAAGTGGTTTGATCAAATCATACCGGGAAGTTCTCAATGAAGCACAGGTTTTTGATCTCTCTGAAGAGTCCCCTGACAAGGTGCTGCACAGGTTGTATGCCAACTTCCAAAGGCTCAAGTCCAACGGTGACCTTCTTGCTATTCAAATAGAGAAGAGCCTGAGACTAATTGTTGCTGGTGGTGATGGCACGGCAAGTTGGCTGCTTGGAGTAGTTAGTGATCTT…
	Deduced amino acid sequence	MDGCAIGSNGSGSKSCGPLSDYRIPDYILKPDSERVIVDNAPSCPVVVFINSRSGGQLGSGLIKSYREVLNEAQVFDLSEESPDKVLHRLYANFQRLKSNGDLLAIQIEKSLRLIVAGGDGTASWLLGVVSDLKLTHSPPVATVPLGTGNNLPFSFGWGKKNPATDQEAVKSFLGLVKEAREMSIDSWHIIMRMRVPQEGPCDPIAPLELPHSLHAFHRVTGSDELNVEGYHTFRGGFWNYFSMGMDAQVSYGFHSERKKNPEKFKNQLSNQGTYAKLGLKQGWFAPSLTHSSSRNISQLAKVKIMKRPGGKWEELKIPSSIRSIICLNLPSFSGGFNPWGTPGTRKKQDRDLTAPYVDDGLIEVVGFRDAWHGLVLLAPNGHGTRLAQAHRIRFEFHK…
	Promoter sequence	AGGGCCGGGGGTCGCTTTCGTCTGCTCTTTCCTCGGCGTCCTCGCCCTCTCGGCGCCCGCCACCACCACCATCCGGGGAAGGAAAGCCCAGCCCCGAATCCACTAGCCCCCCTCCCCTATTAGTACCCCGCTCCCACCAAGAATCTCCCCCAACTCCTCCCTCCCCGGTCTCCGGCCAGTCCATCCACCGAATCCGCCGGACGCGCTGAGCCTCCCCCGACCTCTCCGAACCCGCCGGGCAGTCCAGGTAAAGATCCACGGCCGGCCACCCACCGCTCTGAATCTTGCGAGGGGATCTTTCGGCTGAAGATATTTTCTTTTCTTTTCTTTTCTTGGGTCGTTTGTTTTCCCCCGCATTCCGGTTACCGGAATTCGATCCACGTTCTCTACTGTCGGTGC…
	Genomic sequence	ATGGACGGATGTGCAATTGGTTCTAACGGTTCTGGCAGCAAGTCATGCGGGCCGCTGTCGGACTACCGCATTCCAGACTACATACTAAAGCCGGACTCTGAACGGGTCATCGTTGATAATGCACCATCTTGTCCCGTGGTAGTCTTCATCAACTCTAGAAGCGGTGGCCAACTTGGAAGTGGTTTGATCAAATCATACCGGGAAGTTCTCAATGAAGCACAGGTACCCGGCCTAGCAGTTGCACAAGCTGTGATGCTGAAACAGTGCATTCCATTGATCTATTGGTCCACAGTAGCTATTTAAATCTTGTTTGATTGCTGGGGTGATTTACATCATTCACCTTTTCACAGGTTTTTGATCTCTCTGAAGAGTCCCCTGACAAGGTGCTGCACAGGTTGT…
TaDGK3A	Nucleic acid sequence	ATGGAGAACAGTTTCGAGAAAAATAACATGCTGAAAGAATTCTACATTCCGACCTATATTTTCATGCCAGAATCCTCGGTGGAGCCAGTTTCTCACATACCCACCTGTCCAGTGATTGTTTTTATCAACACCCGAAGTGGTGGCCAACTTGGACATAATTTACTTGTCACATACCGCAAGCTTCTCAATCATGCTCAGGTGTTTGATCTACTTGATGAAACTCCAGACAAAGTCTTGCACAAAATCTACAGCAACGTGGAAAGGCTCAAGCGTGATGGGGATACTCTTGCTTCTGAAATCCATAGGAGATTGAGGCTAATAGTTGCTGGAGGCGATGGAACAGCCGGCTGGTTGCTTGGAGTTGTATCTGATCTCAAGCTAGTTCATCCACCTCCCGTC…
	Deduced amino acid sequence	MENSFEKNNMLKEFYIPTYIFMPESSVEPVSHIPTCPVIVFINTRSGGQLGHNLLVTYRKLLNHAQVFDLLDETPDKVLHKIYSNVERLKRDGDTLASEIHRRLRLIVAGGDGTAGWLLGVVSDLKLVHPPPVATVPLGTGNNLPYSFGWGKRNPGTDRESVISFLKLVKEAREINIDSWHTVMRMKCPKCSPCDPIAPSDLPHSLHAFHRVPKTDPEDMEYSYTYRGGFWNYFSMGMDAQVSYAFHSQRKLHPEKFKNQLSNQKQYLKLACTQGWFCASLSHPMSRNIAHLAKVKIMKKSGKWETLEIPQSIRSIVCLNLPSFSGGLNPWGTPSKRKQRKRDLVLPPLVDDGLLEIVGFKDAWHGLVLLSPKGHGTRLAQAHRVRFKFHRGATDHAYM…
	Promoter sequence	CGCTCCTCCTCGCTGCTGGGAGGGCAGGGGAGGCGAGGGCAGGGCAGGGGAGGGGAGGGGCCGGCCGACGCTCCTGGTGGCCTCCGACGTTCATTCCACACCGCCACGCCCAGCCCCTTGGTTCTTTTGGTGCCGTCCACTGCGGCTCCTTCAAGCGATTCGCCTTCTTCGCGCAGGTGAGGAGAGAGAGGCTCCTCCGGTTATAATTACAAAAAAGGCTCCTCCGGTTGTTAATTCATCTTGCGTCGTTGTGTCGATGTATAATTGCTTGCTCGGTTTGCTTTCCTGATATGATACCAAGCGGGAATTTCGGGGTTCCTAGGATTCGGCCGAGTAAACGCGCCTGTCTTTTTTTAGAAGGGTCTTTTAATGCCTTGTTATTACCAAAATCGGAATGCG…
	Genomic sequence	ATGGAGAACAGTTTCGAGAAAAATAACATGCTGAAAGAATTCTACATTCCGACCTATATTTTCATGCCAGAATCCTCGGTGGAGCCAGTTTCTCACATACCCACCTGTCCAGTGATTGTTTTTATCAACACCCGAAGTGGTGGCCAACTTGGACATAATTTACTTGTCACATACCGCAAGCTTCTCAATCATGCTCAGGTACATATTTTCAAGCTTACAAGATGTACTTGTTCATTATTACAGTACCCATGCATTTTTACCGCCAGAGATAAATATATTGATTTAGGGCAAGTTCTAAATTTCTGAATTGCAGGTGTTTGATCTACTTGATGAAACTCCAGACAAAGTCTTGCACAAAATCTACAGCAACGTGGAAAGGCTCAAGCGTGATGGGGATAC…
TaDGK3B	Nucleic acid sequence	ATGGAGAACAGTTTCGAGAAAAATAACATGCTGAAAGAATTCTACATTCCGACCTATATCTTCATGCCAGAGTCCTCGGTGGAGCAAGTTTCTCACATACCCAGCTGTCCAGTTATTGTTTTTATCAACACCCGAAGTGGCGGGCAACTTGGACATAATTTACTTGTCACATATCGCAAGCTTCTCAATCATGCTCAGGTGTTTGATCTACTTGATGAAACTCCAGACAAAGTCTTACACAAACTATACAGCAACGTGGAAAGGCTCAAGCGTGATGGGGATACTCTTGCTTCTGAAATCCTTAGGAGATTGAGGCTAATAGTTGCTGGAGGCGATGGAACAGCCGGTTGGTTGCTTGGAGTTGTATCTGATCTCAAGCTAGTTCATCCACCTCCCGTC…
	Deduced amino acid sequence	MENSFEKNNMLKEFYIPTYIFMPESSVEQVSHIPSCPVIVFINTRSGGQLGHNLLVTYRKLLNHAQVFDLLDETPDKVLHKLYSNVERLKRDGDTLASEILRRLRLIVAGGDGTAGWLLGVVSDLKLVHPPPVATVPLGTGNNLPYSFGWGKRNPGTDRESVISFLKLVKEAREINIDSWHTVMRMKCPKRSPCDPIAPSDLPHSLHAFHRVPKTDPEDMEYSYTYRGGFWNYFSMGMDAQVSYAFHSQRKLHPEKFKNQLSNQKQYLKLACTQGWFCASLSHPMSRNIAHLAKVKIMKKSGKWETLEIPQSIRSIVCLNLPSFSGGLNPWGTPSKRKQRKRDLVLPPLVDDGLLEIVGFKDAWHGLVLLSPKGHGTRLAQAHRVRFKFHRGATDHAYM…
	Promoter sequence	TCGCCTTCTTCGCGCAGGTGAGAGACAGAGTGATAGAGGCTCCTCCGGTTATTAATTGATCTTGCGTCGTTGTGTCCATGTAGAATTGCTTGCTTGGTTTGCTTTCCTGATATGGTACCAAGCGGGAATTTCGGGGTTCCTAGGATTCGGCCGGGTAAACGCGCCTGTCTTTTTTTGGAAAGGGTCTTTTAATGCCTTGTTATTACCAAAATCGGAATGCAGTGCCGTTCCTTCATCTGCATGCATTTTTTTGTTGCTTGGTTATTGGCTCGGTGCTCCGCGATTACCGTATCTTTTTCCCGTATCCTGTTTGTGATTCGGGTCAATTTCTTCTTCTTCATGTTGTATCTTGCCAGTATCCACTGATTTAATTAGCATGAGCAATGTCTTGCTAGTAAA…
	Genomic sequence	ATGGAGAACAGTTTCGAGAAAAATAACATGCTGAAAGAATTCTACATTCCGACCTATATCTTCATGCCAGAGTCCTCGGTGGAGCAAGTTTCTCACATACCCAGCTGTCCAGTTATTGTTTTTATCAACACCCGAAGTGGCGGGCAACTTGGACATAATTTACTTGTCACATATCGCAAGCTTCTCAATCATGCTCAGGTACATATTTTCAAGTTTACAAGATGTACTTGTTCATTATTACAGTACCCATGCATTTTTACCGCCAGAGATAAATATATTGATTTGGGGCAATTTCTAAATTTCTGAATTGCAGGTGTTTGATCTACTTGATGAAACTCCAGACAAAGTCTTACACAAACTATACAGCAACGTGGAAAGGCTCAAGCGTGATGGGGATAC…
TaDGK3D	Nucleic acid sequence	ATGGAGAACAGTTTCGAGAAAAATAACATGCTGAAAGAATTCTACATTCCGACCTATATTTTCATGCCAGAGTCCTCGGTGGAGCAAGTTTCTCACATACCCTGCTGTCCAGTGATTGTTTTCATCAACACCCGAAGTGGTGGCCAACTTGGACATAATTTACTTATCACATACCGCAAGCTTCTCAATCATGCTCAGGTGTTTGATCTACTTGATGAAACTCCAGACAAAGTCTTACACAAACTCTACAACAACGTGGAAAGGCTCAAGCGTGATGGGGATACTCTTGCTTCTGAAATCCATAGGAGGTTGAGGCTAATAGTTGCTGGAGGCGATGGAACAGCCGGTTGGTTGCTTGGAGTTGTATCTGATCTCAAGCTAGTTCATCCACCTCCCGTT…
	Deduced amino acid sequence	MENSFEKNNMLKEFYIPTYIFMPESSVEQVSHIPCCPVIVFINTRSGGQLGHNLLITYRKLLNHAQVFDLLDETPDKVLHKLYNNVERLKRDGDTLASEIHRRLRLIVAGGDGTAGWLLGVVSDLKLVHPPPVATVPLGTGNNLPYSFGWGKRNPGTDRESVISFLKLVKEAREINIDSWHTVMRMKCPKRSPCDPIAPSDLPHSLHAFHRVPKTDPEDMEYSYTYRGGFWNYFSMGMDAQVSYAFHSQRKLHPEKFKNQLSNQKQYLKLACTQGWFCASLSHPMSRNIAHLAKVKIMKKSGKWETLEIPQSIRSIVCLNLPSFSGGLNPWGTPSKRKQRKRDLVLPPLVDDGLLEIVGFKDAWHGLVLLSPKGHGTRLAQAHRVRFKFHRGATDHAYM…
	Promoter sequence	CTCGGGAGCTCGCCGCACCGCCGCTCCTCCTCCTCGCTGCTGGGAGGGCAGGGGAGGCGAGGGCAGGGGAGGGGAGGAATCATATATTCCTCCTCCGGCCGACGCTCCTGGTGGCATCCGACGTTCATTCCACACCGCCACGCCCAGCACATCCCTTCTTTCTTTTGGTGCCGTCCACTGCAACTCCTTCAAGCGATTCGCCTTCTTCGCGCAGGTGAGAGACAGAGTGATAGAGGCTCCTCCGGTTATTAATTGATCTTGCGTCGTTGTGTTCATGTGGAATTTGCTTGCTCGGTTTGCTTTCCTGGTATGATACCAAGCGGGAATTTCGGGGTTCCCAGGATTCGGCCGGGTAAACGCGCCTCTTTTTTTTTCGAAAGGGTCTTTTAATGCCTTGTT…
	Genomic sequence	ATGGAGAACAGTTTCGAGAAAAATAACATGCTGAAAGAATTCTACATTCCGACCTATATTTTCATGCCAGAGTCCTCGGTGGAGCAAGTTTCTCACATACCCTGCTGTCCAGTGATTGTTTTCATCAACACCCGAAGTGGTGGCCAACTTGGACATAATTTACTTATCACATACCGCAAGCTTCTCAATCATGCTCAGGTACATATTTTCAAGTTTACAAGATGTACTTATTCATTATTACAGTACCCATGCATTTTTACCGCCAGAGATAAATATATTGATTTAGGGCAAGTTCTAAATTTCTGAATTGCAGGTGTTTGATCTACTTGATGAAACTCCAGACAAAGTCTTACACAAACTCTACAACAACGTGGAAAGGCTCAAGCGTGATGGGGATAC…
TaDGK5A	Nucleic acid sequence	ATGTACAGGATGGCGCTTCCAAGCTGGAGTGACATTTCGGCCTACCTGTCAGAGTATTGGTCTGTCATAGCTGCTACTGTCATCTTTGCATTGGTAGGTGGCGTGACAATTTATTATACCATCAATCAGTTGAACAAAAACATCAGCTTGAGCTTGATGAAAGCTATCAGAGCTAGGGCAAAGAAGTACAAGAAACTGAAAGACAAGGTCCCTGCCGCTTCCCACATTTGGAGGAAAGAACTTGGCTCTCGCAGTAAAGGTCTGAAATGCTGTGTATGCTTGAAGTCTGTTTCACCGCCACAGTATTTGGGGGGGACTATCCATGAGTGTGATATTTGTGGTGCCACTGCACATCCGAGTTGCTCAGGGAATGCACACAAAGATTGCAAATGCGTTTCT…
	Deduced amino acid sequence	MYRMALPSWSDISAYLSEYWSVIAATVIFALVGGVTIYYTINQLNKNISLSLMKAIRARAKKYKKLKDKVPAASHIWRKELGSRSKGLKCCVCLKSVSPPQYLGGTIHECDICGATAHPSCSGNAHKDCKCVSMVGLDHVIHQWAVQWIDTADRSEEDSFCCYCDESCSGAFLAGSPIWYCMWCQRIVHVDCHNNLAKETGDVCDLGPLKRLILSPLCLKELHRTGATGLFSSITSGANELASTVRETIRIRSKMYKKDIGPSQPESPGTAEPQSDTDGDSEGSNTTAKRDDHVNGKLHEVHQSTESEKDKQFIADNATSRPNGQHEMSHAQNNQKYEIVDVPSDSRPLLVFINKRSGAQSGDSLRQRLQILLNPLQVFELGKHQGPEVGLSLFRKVPH…
	Promoter sequence	AAACTGTTTTTTTTTTCTGGACTAGAAAGTACAAACTGTAGGCCCGCTGGCCAGTGACCCCAACCCAGCCACCACCGACATCGCGCCCGGGTGCGCGTAGCACGCACCAACAGCAGCGAAAGCATTGGCTTACTCACGAAGCTTCTCGGCCAGGGCGCACCGTCCCGCTGCAGGTGGGCCCAACAGACCGCCCATACCACACCGCTAAACTAATAATCAGGCAACGAATCACACTCCCGAGGGAAAGCTCGCCCCGAGATCACCCGATCCCTCCCGTCCGTCGCCCCGCCAACGGCGCAGATCGCGCGGGTGGACGTGGCCCGCGACCCCCGAACGCCACAAAGTGTCGTGATCAACTCACTAACACGGATTAAATATCCCTCTTAACCTTTTTCCGAC…
	Genomic sequence	ATGTACAGGATGGCGCTTCCAAGCTGGAGTGACATTTCGGCCTACCTGTCAGAGTATTGGTCTGTCATAGCTGCTACTGTCATCTTTGCATTGGTAGGTGGCGTGACAATTTATTATACCATCAATCAGTTGAACAAAAACATCAGCTTGAGCTTGATGAAAGCTATCAGAGCTAGGGCAAAGAAGTACAAGAAACTGAAAGACAAGGTCCCTGCCGCTTCCCACATTTGGAGGAAAGAACTTGGCTCTCGCAGTAAAGGTCTGAAATGCTGTGTATGCTTGAAGTCTGTTTCACCGCCACAGTATTTGGGGGGGACTATCCATGAGTGTGATATTTGTGGTGCCACTGCACATCCGAGTTGCTCAGGGAATGCACACAAAGATTGCAAATGCGTTTCT…
TaDGK5B	Nucleic acid sequence	ATGCACAGGATGGCGCTTCCTAGCTGGAGTGACATTTCGGCCTACCTGTCAGAGTATTGGTCTGTCGTAGCTGCCACTGTCATCTTTGCATTGGTAGGTGGCGTGACAATTTATTATACCATCAATCAGTTGAACAAAAATATCAGCTTGAGCTTGATGAAAGCTATCAGAGCAAGGGCAAAGAAGTACAAGAAACTGAAAGACAAGGTCCCTGCCGCTTCCCACATCTGGAGGAAAGAACCTGGCTCTCGCAGTAAAGGTCTGAAATGCTGTGTATGCTTGAAGTCTGTTTCACCGCCACAGTATTTGGGGGGGACTATCCATCAGTGTGATATTTGTGGTGCCACTGCACATCCTAGTTGCTCAGGGAATGCACACAAAGATTGCAAATGCGTTTCT…
	Deduced amino acid sequence	MHRMALPSWSDISAYLSEYWSVVAATVIFALVGGVTIYYTINQLNKNISLSLMKAIRARAKKYKKLKDKVPAASHIWRKEPGSRSKGLKCCVCLKSVSPPQYLGGTIHQCDICGATAHPSCSGNAHKDCKCVSMVGLDHVIHQWAVQWIDTADRSEEDSFCCYCDESCSGAFLGGSPIWYCMWCQRIVHVDCHNNLAKETGDVCDLGPLKRLILSPLCVKELHRTGATGLFSSITSGANELASTVRETIRIRSKRYKKNIGSSQPESPGTAEPQSDTDGDSEGSNNTAKRDDHVNGKLHEVHQSTESEKDKQFIADTATSRPNGQHEMSHAQNNQKYEIVDVPSDSRPLLVFINKRSGAQSGDSLRQRLQILLNPLQVFELGKHQGPEVGLSLFRKVPH…
	Promoter sequence	ACCACAACAATCGCACTATTTTCTTTATATAAACAAACCATGCTCTTAAACTGTTTTTTTTTCTGGACTAGAAAGTACAAACTGTGGGCCCGCTGGCCAGTGACCCCAACACTGCGCCCACCGACATCGCGCCTGGGGTGCGCGTAGCACGCACCAACAGCAGCGAAAGCCTTCGCTTACTCACGAAGCTTCTCGGCCAGGGCGCACCGCCCGCTGCAGGTGGGCCCAACAGACCGCCCATACCACACCGCTAAACTAATAATCAGCCAATGAATCACACTCCCGAGGGAAAGCTCGCCCCGAGATCACCCGATCCCCCCCGTCCGTCGCCCCGCCAACGGCGCAGATCGCGCGGGCGGACGTGGCCCGCGGCACCCGAACTCCACAAAGTGTCGTGAT…
	Genomic sequence	ATGCACAGGATGGCGCTTCCTAGCTGGAGTGACATTTCGGCCTACCTGTCAGAGTATTGGTCTGTCGTAGCTGCCACTGTCATCTTTGCATTGGTAGGTGGCGTGACAATTTATTATACCATCAATCAGTTGAACAAAAATATCAGCTTGAGCTTGATGAAAGCTATCAGAGCAAGGGCAAAGAAGTACAAGAAACTGAAAGACAAGGTCCCTGCCGCTTCCCACATCTGGAGGAAAGAACCTGGCTCTCGCAGTAAAGGTCTGAAATGCTGTGTATGCTTGAAGTCTGTTTCACCGCCACAGTATTTGGGGGGGACTATCCATCAGTGTGATATTTGTGGTGCCACTGCACATCCTAGTTGCTCAGGGAATGCACACAAAGATTGCAAATGCGTTTCT…
TaDGK5D	Nucleic acid sequence	ATGTACAGGATGGCGCTTCCTAGCTGGAGTGACATTTCGGCCTACCTGTCAGAGTATTGGTCTGTCATAGCTGCTACTGTCATCTTTGCATTGGTAGGTGGCGTGACAATTTATTATACCATCAATCAGTTGAACAAAAACATCAGCTTGAGCTTGATGAAAGCTATCAGAGCTAGGGCAAAGAAGTACAAGAAACTGAAAGACAAGGTCCCTGCCGCTTCCCACATTTGGAGGAAAGAACTTGGCTCTCGCAGTAAAGGTCTGAAATGTTGTGTATGCTTGAAGTCTGTTTCACCGCCACAGTATTTGGGGGGGACTATCCATGAGTGTGATATTTGTGGTGCCACTGCACATCCGAGTTGCTCAGGAAATGCACACAAAGATTGCAAATGCGTTTCT…
	Deduced amino acid sequence	MYRMALPSWSDISAYLSEYWSVIAATVIFALVGGVTIYYTINQLNKNISLSLMKAIRARAKKYKKLKDKVPAASHIWRKELGSRSKGLKCCVCLKSVSPPQYLGGTIHECDICGATAHPSCSGNAHKDCKCVSMVGLDHVIHQWAVQWIDTADRSEEDSFCCYCDESCSGAFLAGSPIWYCMWCQRIVHVDCHNNLAKETGDVCDLGPLKRLILSPLCVKELHRTGATGLFSSITSGANELASTVRETIRIRSKRYKKDIGSSQPESPGTAEPQSDTDGDSEGSNTTAKRDDHVNGKLHEVHQSTESEKDKQFIADNAASRPNGQHEMSHAQNNQKYEIVDVPSDSRPLLVFINKRSGAQSGDSLRQRLQILLNPLQVFELGKHQGPEVGLSLFRKVPH…
	Promoter sequence	GATTCGAACACCCTAGCGTTCCTCTGTTTTTAAACTGTTTTTCTCTGGACTAGAAAGTACAAACTGTGGGCCCGCTGGTCAGTGACCCCAACACTGCCACTACCGACAAGCTGCCCGGGTGCGCGTAGCACGCACCAAAGCAGCGAAAGCCTTCGCTTACTCACGAAGCTTCTCGGCCAGGGCGCACCGTCCCAATGCAGGTGGGGCCCAACAGACCGCCCATACCACACCGCTAAAACTAATCAGCCAATGAATCACACTCCCGAGGGAAAGCTCGCCCCGGGATCACCCGATCTCCCCCGTCCGTCGCCCCGCCAACGGCGCAGATCGCGCGGGCGGACGTGGCCCAAGGCACCCGAACGCCAGAAAGTGTCGTGATCAACTCACTAATACGCATTA…
	Genomic sequence	ATGTACAGGATGGCGCTTCCTAGCTGGAGTGACATTTCGGCCTACCTGTCAGAGTATTGGTCTGTCATAGCTGCTACTGTCATCTTTGCATTGGTAGGTGGCGTGACAATTTATTATACCATCAATCAGTTGAACAAAAACATCAGCTTGAGCTTGATGAAAGCTATCAGAGCTAGGGCAAAGAAGTACAAGAAACTGAAAGACAAGGTCCCTGCCGCTTCCCACATTTGGAGGAAAGAACTTGGCTCTCGCAGTAAAGGTCTGAAATGTTGTGTATGCTTGAAGTCTGTTTCACCGCCACAGTATTTGGGGGGGACTATCCATGAGTGTGATATTTGTGGTGCCACTGCACATCCGAGTTGCTCAGGAAATGCACACAAAGATTGCAAATGCGTTTCT…
TaDGK5A2	Nucleic acid sequence	ATGGACCTGGTGGGATCACTGCTGATAAACATGACCCGCTGGGTTGACCCTTCTGGGGTTGAATTCTTCGGGTGGCTCATCACTGCCGGTTCCTTTGGCCTGGCGGCGCTCATCTACGGTCTCCTCAGGCTGCAGAGGGAGGCGTCGCTCTACTGGCTCAAGGCGGCCGCCAGGGAGAAGAAGGCAGCGTCGAAGGTGCTACGGTGCCCCTGCTCAAGCCATACCTGGACCGAGGACTGCTTCCGTGGTGGCCAACCTTCGACGTGCTGTGTGTGCCTGTCGTCGCTGGCCTTGCCTCAGGGTGTAGGCTTGAGGGCCCTTGACGCTGATGTTGTTTACCGGTGCTCTGTGTGCGGAGTGGCGGCTCATTGGTACTGCTCGCAGGGCGCTGACAAGGAC…
	Deduced amino acid sequence	MDLVGSLLINMTRWVDPSGVEFFGWLITAGSFGLAALIYGLLRLQREASLYWLKAAAREKKAASKVLRCPCSSHTWTEDCFRGGQPSTCCVCLSSLALPQGVGLRALDADVVYRCSVCGVAAHWYCSQGADKDCKCVTQAGASTLLHHWSERWVEMDDNPAITTFCYYCDEPCGVPFLGVSPIWRCLWCQRQIHVDCHAKLLKETGNTCDLGLLSRLIVPPLSVKQVGQGPATSGAFNSIKEGFVTSSVRGRIRRPRSKKRMNNQSGIKTTAISTDSSILDSVLEGFARLQNLNGKYTLANPKFSGNTLKQTCGSDITNGEEKKYELVDMPQDSRPLLVFINGKSGGRNGSSLRRRMNMLLNPIQIFELSASQGPEVGLQLFQNVKHFRILVCGGDGTV…
	Promoter sequence	ACAAGGAATTCTGAAGATGGGCTTGACTTCGTCCGGTGCAACCAGTTGAACAGGAAATTTTCCAAAATAAATAATTTGCTCATTGTTGACCGCTTTAAATGTGTTCATCATTCTCCCATGGTGACTACTGTCACTGATAGCCACATCACCTTGCGGTCGTGGTGGCGAAGAGGTCGCGATGATCACCTCAACGCAATAGGGGTGGTTGTCAGCCGGCTACTGGCTGCTCTGGAGCTCTCGTCGGAAGCTGCCGAGACCGCCGTGGTACGTCATCGGCGGTCGTGTCCCCTCTGCCACCGGCAAAGACGACAACGACCAAACCTTCTTCGATCGACGACCAAAACTACGGCGAAAGCGAGGGCGTGGTGGCGGTCATGTCGAGACGTGGTTTGGTAGGGA…
	Genomic sequence	ATGGACCTGGTGGGATCACTGCTGATAAACATGACCCGCTGGGTTGACCCTTCTGGGGTTGAATTCTTCGGGTGGCTCATCACTGCCGGTTCCTTTGGCCTGGCGGCGCTCATCTACGGTCTCCTCAGGCTGCAGAGGGAGGCGTCGCTCTACTGGCTCAAGGCGGCCGCCAGGGAGAAGAAGGCAGCGTCGAAGGTGCTACGGTGCCCCTGCTCAAGCCATACCTGGACCGAGGACTGCTTCCGTGGTGGCCAACCTTCGACGTGCTGTGTGTGCCTGTCGTCGCTGGCCTTGCCTCAGGGTGTAGGCTTGAGGGCCCTTGACGCTGATGTTGTTTACCGGTGCTCTGTGTGCGGAGTGGCGGCTCATTGGTACTGCTCGCAGGGCGCTGACAAGGAC…
TaDGK5B2	Nucleic acid sequence	ATGGACATGGTGGGATCGCTGCTGATAAACATGACCCGCTGGGTTGACCCTTCTGGGATTGAATTCTTCGGGTGGCTCATCACTGCCGGTTCCTTTGGCCTGGCGGCGCTCATCTACGGTCTCCTCAGGCTGCAGAGGGAGGCGTCGCTCTACTGGCTCAAGGCGGCCGCCAGGGAGAAGAAGGCAGCGTCGAAGGTGCTACGGTGCCCCTGCTCAAGCCATACCTGGACCAAGGACTGCTTCCGTGGTGGCCAACCTTCGACGTGCTGTGTGTGCCTGTCGTCGCTGGCCTTGCCTCAGGGTGTAGGTTCAAGGGCCCTTGACGCTGATGTTGTTTACCGGTGCTCTGTGTGCGGAGTGGCGGCTCACTGGTACTGCTCGCAGGGCGCTGACAAGGAC…
	Deduced amino acid sequence	MDMVGSLLINMTRWVDPSGIEFFGWLITAGSFGLAALIYGLLRLQREASLYWLKAAAREKKAASKVLRCPCSSHTWTKDCFRGGQPSTCCVCLSSLALPQGVGSRALDADVVYRCSVCGVAAHWYCSQGADKDCKCVTQAGASTLLHHWSERWVEMDDNPEITTFCYYCDEPCGVPFLGVSPIWRCLWCQRQIHVDCHAKLLKETGNTCDLGLLSRLIVPPLSVKQVGQCPATSGVFNSIKEGFVTSSVRGRIRRPRSKKRMNNQSGIKTTAISADSSILDSVLEGFARLQNLNGKYTLANPKFSGNTLKQTCGSDITNAEEKKYELVDLPQDSRPLLVFINGKSGARNGPSLRRRLNMLLNPIQIFELSASQGPEVGLQLFQNVKHFRILVCGGDGTV…
	Promoter sequence	AAATATACTACTCCCTCCGTTACTAAATATTTGTCTTTTTAGAGATTTCAACAAGTGACTACATACGAAGCAAAATGAGTGAATCTATACTCTAAAATATGTCTATATACATCCGTATGTGGTAGTCCATTTGAAATCTCTAAAAAGACAAATATTTAGAAACAAAGGGAGGAGTTTATTTCTTATAGCCCACTCACTCAGCTCTATTGTACTTGCTCTTGCTCTTATGAATAGTAAACAGCGTGAGCTCCAGTTCCCCAGGACAAGGGGGCACCCACAACAGACCGATCATCACATTCGCAGGGTTCCCCGATTCCCCCGGCCCCTGCCTCTGCTCCTTTTTAAACGAGCCGGCACGCCACCGCGACCACGCCGAGTCGTCCTCGTCCCTCTGCCCCT…
	Genomic sequence	ATGGACATGGTGGGATCGCTGCTGATAAACATGACCCGCTGGGTTGACCCTTCTGGGATTGAATTCTTCGGGTGGCTCATCACTGCCGGTTCCTTTGGCCTGGCGGCGCTCATCTACGGTCTCCTCAGGCTGCAGAGGGAGGCGTCGCTCTACTGGCTCAAGGCGGCCGCCAGGGAGAAGAAGGCAGCGTCGAAGGTGCTACGGTGCCCCTGCTCAAGCCATACCTGGACCAAGGACTGCTTCCGTGGTGGCCAACCTTCGACGTGCTGTGTGTGCCTGTCGTCGCTGGCCTTGCCTCAGGGTGTAGGTTCAAGGGCCCTTGACGCTGATGTTGTTTACCGGTGCTCTGTGTGCGGAGTGGCGGCTCACTGGTACTGCTCGCAGGGCGCTGACAAGGAC…
TaDGK5D2	Nucleic acid sequence	ATGGACCTGGTGGGATCACTGCTGATAAACATGACCCGCTGGGTTGACCCTTCTGGGATTGAATTCTTCGGGTGGCTCATCACTGCCGGTTCCTTTGGCCTGGCGGCGCTCATCTACGGTCTCCTCAGGCTGCAGAGGGAGGCGTCGCTGTACTGGCTCAAGGCGGCCGCCAGGGAGAAGAAGGCTGTGTCGAAGGTGCTACGGTGCCCCTGCTCAAGCCATACCTGGACCGAGGACCGCTTCCGTGGTGGCCAACCTTCGACGTGCTGTGTGTGCCTGTCGTCCCTGGCCTTGCCTCAGGGTGTAGGCTCGAGGGCCCTTGACGCTGATGTTGTTTACCGGTGCTCTGTGTGCGGAGTGGCGGCTCATTGGTACTGCTCGCAGGGCGCTGACAAGGAC…
	Deduced amino acid sequence	MDLVGSLLINMTRWVDPSGIEFFGWLITAGSFGLAALIYGLLRLQREASLYWLKAAAREKKAVSKVLRCPCSSHTWTEDRFRGGQPSTCCVCLSSLALPQGVGSRALDADVVYRCSVCGVAAHWYCSQGADKDCKCVTQAGASTLLHHWSERWVEMDDNPEITTFCYYCDEPCGVPFLGVSPIWRCLWCQRQIHVDCHAKLLKETGNTCDLGLLSRLIVPPLSVKQVGQGPATSGVFNSIKEGFVTSSVRGRIRRPRSKKRMNNQSGIKTTAISADSSILDSVLEGFARLQNLNGKYTLANPKFSGNTPKQTCGSDITNGEEKKYELVDLPQDSRPLLVFINGKSGGRNGPSLRRRLNMLLNPIQIFELSVSQGPEVGLQLFQNVKHFRILVCGGDGTV…
	Promoter sequence	GAGATGAGACTATGTATTATCTTAATTAATCTTATTTTAACCAACAACACAGGCCAGCTCGAGTAGGTGTACTAGTCGACAGGTTTTGGGTTCGAGTCTATTCGTCAGTGAGTATTTTTTGCCTCGCTAGATGAGTTGGTTGCAGGCGGAAGAGTGGCAGTACAGGTCGTGAGATCGAATCGCCCCATGCGCAAATGTTTTCTACGAAGCCGCTGGCTCACCGGCCCACTCCGACTTCTGACCCAGGAGACTTAATTTTCTGTTGTGGACTAAAAATTGGACATGTACGTTATTTTCGTATCACCTCGTTAGCGGCTTGTCGGACCAAAAATAATCATGTGCGGACAGACGAGGGTTTAGGGTTTAGGGTTTAAGTATAAATATAGGTATAAATATAGA…
	Genomic sequence	ATGGACCTGGTGGGATCACTGCTGATAAACATGACCCGCTGGGTTGACCCTTCTGGGATTGAATTCTTCGGGTGGCTCATCACTGCCGGTTCCTTTGGCCTGGCGGCGCTCATCTACGGTCTCCTCAGGCTGCAGAGGGAGGCGTCGCTGTACTGGCTCAAGGCGGCCGCCAGGGAGAAGAAGGCTGTGTCGAAGGTGCTACGGTGCCCCTGCTCAAGCCATACCTGGACCGAGGACCGCTTCCGTGGTGGCCAACCTTCGACGTGCTGTGTGTGCCTGTCGTCCCTGGCCTTGCCTCAGGGTGTAGGCTCGAGGGCCCTTGACGCTGATGTTGTTTACCGGTGCTCTGTGTGCGGAGTGGCGGCTCATTGGTACTGCTCGCAGGGCGCTGACAAGGAC…
TaDGK6A	Nucleic acid sequence	ATGGCCGGCAACGGCGACGCCGCCGTCCACACGCCCCACTCCGCGCCGCCGACGGCACCGTCGGCGCGCGTGTCGATCTGGGAGTCGGTGCGCGCGTGCGGGGTGTGGGGCCGGGACGTCGACAAGGCCGAGCTGCGGCGCCGCGTCGTCATGCCGCTCTACGCGCGGAGGGCCGTGGCCGCCGCCGTCGCCGAGAAGGACGAGGCCGCCGGCGTGGCGGCCGCCGCGGCGGCGAGGGACGAGGCGGTGGGCGGCGGGGAGGGGGAGGACGGGCTGGAGGTGGTGGCGCCGATGGTCGTGTTCGTCAACTCCAAGAGCGGCGGGCGCCACGGGCCCGAGCTCAAGGTGCGGCTCCACGAGCTCATCAGCAAGGAGCAGGTCTTCGATCTTTCTACTGTG…
	Deduced amino acid sequence	MAGNGDAAVHTPHSAPPTAPSARVSIWESVRACGVWGRDVDKAELRRRVVMPLYARRAVAAAVAEKDEAAGVAAAAAARDEAVGGGEGEDGLEVVAPMVVFVNSKSGGRHGPELKVRLHELISKEQVFDLSTVKPSDFVRYGLGCLERLADQGDNCAKDIRANLRIMVAGGDGTVGWVLGCLQELNKSKREPVPPTGIIPLGTGNDLARSFGWGGSFPFGWRSAVKRYLNKAVSASVVHLDSWQAVIRMPEGEITELPHALKKAEPADQLEFSKASGSELTEKASCYKGVFYNYLSIGMDAQVAYGFHHLRDEKPYLAQGPVANKLIYAGYSCTQGWFCTPCTASPQLRGLRNILRLYIKRANCSEWEQIQMPSSVRSIVVLNLDNYASGKHPWGDLKP…
	Promoter sequence	TGGATCCCTCCGGCCGTCGTCGACTTCATGATCACCGCCACTGAACACCACCTGATGAAAGACCGACACTGAAGCCCTTATCTCCTTCGTCGTCCACAGTAGCCCTCCAACACCTCTACAACAAGTAGCCCCAGGTCGGTACCTCTTCCACCGTCGCTGACTCGCCGTTGGTTTCTTTGCCTAGCAACGTGCACTGGCGGTGGCAAAGAGCAGGAGGTGACGGGTGGCGTCTAGGGTTTCGGATAATAAAGCATCACTGAGTGCATCTCCAAGGCGGGCTCGTAAACCGCTCACATTCGTCCGGACCACGGAAGCCATCCAGTCCGGGCTCGTTCCCCCCTTACTTTGCATCCGCACCCTTCACCTCTGCCGCCGCCGCTGTACGCAACATGAGGTCGT…
	Genomic sequence	ATGGCCGGCAACGGCGACGCCGCCGTCCACACGCCCCACTCCGCGCCGCCGACGGCACCGTCGGCGCGCGTGTCGATCTGGGAGTCGGTGCGCGCGTGCGGGGTGTGGGGCCGGGACGTCGACAAGGCCGAGCTGCGGCGCCGCGTCGTCATGCCGCTCTACGCGCGGAGGGCCGTGGCCGCCGCCGTCGCCGAGAAGGACGAGGCCGCCGGCGTGGCGGCCGCCGCGGCGGCGAGGGACGAGGCGGTGGGCGGCGGGGAGGGGGAGGACGGGCTGGAGGTGGTGGCGCCGATGGTCGTGTTCGTCAACTCCAAGAGCGGCGGGCGCCACGGGCCCGAGCTCAAGGTGCGGCTCCACGAGCTCATCAGCAAGGAGCAGGTGGGTGATGACCTCGCGATT…
TaDGK6B	Nucleic acid sequence	ATGGAGCGGGCGGAGGCGGAGGTGGGGATGGCCGGCAACGGCGACGCCGTCCACACGCCCCACTCGGCGCCGCCGACGGCGCCGTCGGCGCGGGTGTCGATTTGGGAGTCGGTGCGCGCGTGCGGGGTGTGGGGCCGGGACGTCGACAAGGCCGAGCTGCGGCGCCGCGTCGTCATGCCGCTCTACGCGCGCCGCGCCGTGGCCGCCGCCGTCGCCGAGAAGGACGAGGCCGCCGGCGTGGCGGCCGCCGCGGCGGCGAGGGACGAGGGAGGGGAAGACGGGGAGGAAGGATTGGAGGTGGTGACGCCGATGGTCGTGTTCGTCAACTCCAAGAGCGGCGGGCGCCACGGGCCCGAGCTCAAGGTGCGCCTGCACGAGCTCATCAGCAAGGAGCAGGTC…
	Deduced amino acid sequence	MERAEAEVGMAGNGDAVHTPHSAPPTAPSARVSIWESVRACGVWGRDVDKAELRRRVVMPLYARRAVAAAVAEKDEAAGVAAAAAARDEGGEDGEEGLEVVTPMVVFVNSKSGGRHGPELKVRLHELISKEQVFDLSSVKPSDFVRYGLGCLERLADQGDNCAKDIRANLRIMVAGGDGTVGWVLGCLQELNKLKREPVPPTGIIPLGTGNDLARSFGWGGSFPFGWRSAVKRYLNKAVSASVVHLDSWQAVIRMPEGEITELPHALKKAEPADQLEFSKASGSELTEKASCYKGVFYNYLSIGMDAQVAYGFHHLRDEKPYLAQGPVANKLIYAGYSCTQGWFCTPCTASPQLRGLRNILRLYIKRANCSEWEQIQMPSSVRSLVVLNLYNYGSGRHP…
	Promoter sequence	CATCGACAAATGCGGAGAATACCATGTGAAAGTTGAGTTCAGATGTTAGGGAATTTTGTAAGAGATCTTATATTGTCTATATATATATATATATATATATATATATATATATATATATATATATAGCCAGTAGCATCAGATAGATATATGAAAACTTTTTGTTCGACCAATCTATCGGAGAATGAGAGGTCGATCACTTCTCTCTGTGTATATGTTCATGATGATCTTCTGTACTTAATGGTTTCCTTCATTTACTTACTAGCTAACTAGCGTGTCAAGTACTCTCTATACGTATAGTACGTAGCGTCGACCAAGCACCGAGATAAAAGAGGACACTTCTCTCTATTAGCTAGCTAACACAATATATGAAACCCCTAAATTAACCCTACAAAACCCCCA…
	Genomic sequence	ATGGAGCGGGCGGAGGCGGAGGTGGGGATGGCCGGCAACGGCGACGCCGTCCACACGCCCCACTCGGCGCCGCCGACGGCGCCGTCGGCGCGGGTGTCGATTTGGGAGTCGGTGCGCGCGTGCGGGGTGTGGGGCCGGGACGTCGACAAGGCCGAGCTGCGGCGCCGCGTCGTCATGCCGCTCTACGCGCGCCGCGCCGTGGCCGCCGCCGTCGCCGAGAAGGACGAGGCCGCCGGCGTGGCGGCCGCCGCGGCGGCGAGGGACGAGGGAGGGGAAGACGGGGAGGAAGGATTGGAGGTGGTGACGCCGATGGTCGTGTTCGTCAACTCCAAGAGCGGCGGGCGCCACGGGCCCGAGCTCAAGGTGCGCCTGCACGAGCTCATCAGCAAGGAGCAGGTG…
TaDGK6D	Nucleic acid sequence	ATGGAGCGGGCGGAGGCGGAGGTGGAGATGGCCGGCAACGGCGACGCAGTCCACACGCCCCACTCCGCGCCGCCGACGGCGCCGTCGGCGCGGGTGTCGATCTGGGAGTCGGTCCGCGCGTGCGGGGTGTGGGGCCGCGACGTCGACAAGGCCGAGCTGCGGCGCCGCGTCGTCATGCCGCTCTACGCGCGGAGGGCCGTCGCCGCCGCCGTCGCCGAGAAGGACGAGGCCGCCGGCGTGGCGGCCGCCGCGGCGGCGAGGGACGAGGCGGTGGGGGGCGCGGAGGAGGAGGACGGGCTGGAGGTGGTGACGCCGATGGTCGTGTTCGTCAACTCCAAGAGCGGCGGGCGCCACGGGCCCGAGCTCAAGGTGCGGCTCCACGAGCTCATCAGCAAGGAG…
	Deduced amino acid sequence	MERAEAEVEMAGNGDAVHTPHSAPPTAPSARVSIWESVRACGVWGRDVDKAELRRRVVMPLYARRAVAAAVAEKDEAAGVAAAAAARDEAVGGAEEEDGLEVVTPMVVFVNSKSGGRHGPELKVRLHELISKEQVFDLSVVKPSDFVRYGLGCLERLADQGDNCAKDIRANLRIMVAGGDGTVGWVLGCLQELNKSKREPVPPTGIIPLGTGNDLARSFGWGGSFPFGWRSAVKRYLNKAVSASVVHLDSWQAVIRMPEGEITELPHALKKAEPADQLEFSKASGSELTEKASCYKGVFYNYLSIGMDAQVAYGFHHLRDEKPYLAQGPVANKLIYAGYSCTQGWFCTPCTASPQLRGLRNILRLYIKRANCSEWEQIQMPSSVRSIVVLNLDNYASGK…
	Promoter sequence	CCCTTATCTCATTCGCCGTCCACAATAGCCCTCCAACACCTCTACAACAAGTAGACTCCGGTCGGTACCTCTTCCACTGTCGCCGACTCTCCGCTGGTTTCTTTACCTGGCAACATGCACTGGCGGTGGCAAGAGCAGGAGACGGCGAGTGGTGTCTAGGGTTTTGGATAATAATGCATCACCGCGTGCATCTCCAAGGCGGACCCGTAAACCGCTCACATCCGTCCGGACTATGGAAGCCATCCAATGCGGTCCTGTATCTGTCCGCAACGCGGTCCAAACGTGTTTTTTCCCGCAAATTGGAGATAAATTGGGGGAGGTTTGCGGGAGTCTGAACACCCGAAACGTCGCTCTCCGCCACCCTATGTCCACCCAATCCCCCTCCCGGTCCCATTTTCC…
	Genomic sequence	ATGGAGCGGGCGGAGGCGGAGGTGGAGATGGCCGGCAACGGCGACGCAGTCCACACGCCCCACTCCGCGCCGCCGACGGCGCCGTCGGCGCGGGTGTCGATCTGGGAGTCGGTCCGCGCGTGCGGGGTGTGGGGCCGCGACGTCGACAAGGCCGAGCTGCGGCGCCGCGTCGTCATGCCGCTCTACGCGCGGAGGGCCGTCGCCGCCGCCGTCGCCGAGAAGGACGAGGCCGCCGGCGTGGCGGCCGCCGCGGCGGCGAGGGACGAGGCGGTGGGGGGCGCGGAGGAGGAGGACGGGCTGGAGGTGGTGACGCCGATGGTCGTGTTCGTCAACTCCAAGAGCGGCGGGCGCCACGGGCCCGAGCTCAAGGTGCGGCTCCACGAGCTCATCAGCAAGGAG…
TaDGK7B2	Nucleic acid sequence	ATGGAAGAGGAGATAGAAACCCCTAGAGATCCGAAGCCATGTGGGCCTTTGGAGGAGTACCGCATTCCAGATTACGTCTTGAGACCAGATGCCCAACAAGTACTTGTTGATCATGCTCCACAGTGTCCTGTATTAGTGTTCATCAATTCTAAATCTGGCGGTCAACTTGGAAGTAGTTTGATCAAAACATACCGTGAACTTCTGAATGAAGCCCAGGTTATTGATCTCTCAGAAGAGGCTCCGGATAAGGTTTTGCAGCGTTTATATGTGAATGTTGAAAGGCTCAAGATGGAAGGAGACATTCTTGCCGTTCAAATTTGGAGGACTATGAGATTAATTGTTGCAGGTGGCGATGGTACAGCGAGTTGGTTGCTTGGGGTCGTCAGTGATCTTAAGCTT…
	Deduced amino acid sequence	MEEEIETPRDPKPCGPLEEYRIPDYVLRPDAQQVLVDHAPQCPVLVFINSKSGGQLGSSLIKTYRELLNEAQVIDLSEEAPDKVLQRLYVNVERLKMEGDILAVQIWRTMRLIVAGGDGTASWLLGVVSDLKLSHPPPIATVPLGTGNNLPFSFGWGKKNPSTDQEAVKLFLGLVKHAKEIKIDSWHLILRMRAPKEGPCEPIAPLELPHSLHAFHRVSSGDSHDVEGYHTFRGGFWNYFSMGMDAEISYAFHTERKRNPDKFKNQLTNQGQYAKLGLKQGWFCASLSHPSSRNIPHFAKVKVMKKPGGHWEELQIHHSIRSIVCVNLPSFSGGLNPWGDPGARRINTEFTLPYVDDGLIEVVGFRDAWHGLVLLAPNGHGHRLAQAHRIRFEFHKGVV…
	Promoter sequence	TGGCTGCTAAAGCACTTGTGGGGGTCTGGCTTGTGCGTTGGGCGACGTTGTTGGTGCCTTGAGGCCATAGATCCCCGCCAGGACATGGGTCTGCTAGCATCGTGCACCATCGACTTCGACCAAGAGGGTCGGGTCGTGGCCATGTCTGGCATGCTCCGCGTTGGCCTGGTGCGCCGACCCCTCACTGGCATCCACATATATGCATTTCTTTTTTTCCCTTGTGTGTCATGTTGCATTGTATTCTTTGTTAGGTGTGCTAGGAATCACCCTATATTTGGTTTGGCTTTATTTATATTTTGACTGGACATATTTCCTTTGTGTATTTTTGGAGCAAGGAAACAGTGCACATGCTGGCCCAAAACGATTGAGAAAGAGCGGGTGAATCCAGAACGGGAGCGC…
	Genomic sequence	ATGGAAGAGGAGATAGAAACCCCTAGAGATCCGAAGCCATGTGGGCCTTTGGAGGAGTACCGCATTCCAGATTACGTCTTGAGACCAGATGCCCAACAAGTACTTGTTGATCATGCTCCACAGTGTCCTGTATTAGTGTTCATCAATTCTAAATCTGGCGGTCAACTTGGAAGTAGTTTGATCAAAACATACCGTGAACTTCTGAATGAAGCCCAGGTACTTATTCTGTCTTTGGATTTTGAATTTGGAATTGTTGTCAGAGCCACTGAGTTCTTTTTCAGGTTATTGATCTCTCAGAAGAGGCTCCGGATAAGGTTTTGCAGCGTTTATATGTGAATGTTGAAAGGCTCAAGATGGAAGGAGACATTCTTGCCGTTCAAATTTGGAGGACTATGAGAT…
TaDGK7D2	Nucleic acid sequence	ATGGAAGAGGAGATAGAAACCCCTAGAGATCCGAAGCCATGTGGGCCTTTGGAGGAGTACCGCATTCCAGATTACGTCTTGAGACCAGATGCCCAACAAGTACTTGTTGATCATGCTCCACAGTGTCCTGTATTAGTGTTCATCAATTCTAAATCTGGCGGTCAACTTGGAAGTAGTTTGATCAAAACATACCGTGAACTTCTGAATGAAGCCCAGGTTATTGATCTCTCAGAAGAGGCTCCGGATAAGGTTTTGCAGCGTTTATATGTGAATGTTGAAAGGCTCAAGATGGAAGGAGACATTCTTGCCGTTCAAATTTGGAGGACTATGAGATTAATTGTTGCAGGTGGCGATGGTACAGCGAGTTGGTTGCTTGGGGTCGTCAGTGATCTTAAGCTT…
	Deduced amino acid sequence	MEEEIETPRDPKPCGPLEEYRIPDYVLRPDAQQVLVDHAPQCPVLVFINSKSGGQLGSSLIKTYRELLNEAQVIDLSEEAPDKVLQRLYVNVERLKMEGDILAVQIWRTMRLIVAGGDGTASWLLGVVSDLKLSHPPPIATVPLGTGNNLPFSFGWGKENPSTDQEAVKLFLGLVKHAKEIKIDSWHLILRMRAPKEGPCEPIAPLELPHSLHAFHRVSSGDSHDVEGYHTFRGGFWNYFSMGMDAEISYAFHTERKRNPDKFKNQLTNQGQYAKLGLKQGWFCASLSHPSSRNIPHFAKVKVMKKPGGHWEELQIHHSIRSIVCVNLPSFSGGLNPWGDPGARRINTEFTLPYVDDGLIEVVGFRDAWHGLVLLAPNGHGHRLAQAHRIRFEFHKGVV…
	Promoter sequence	CCTGCAGATTAGGTGCACACATTTTAATGATTTAGTTTAACTCAGCAAACTACAATGTCAATGTATAATGATATTTGTTGTATTTAGCATCACGCAAACAACAAATCAAACATATTGACGTCGAGAAGGGTAAATAAAACCCCAAGGGCATAATGAAAAGGGGAATTGAGTTAACCATGAAATAAAAACCTAGGTAAGGCCTTAAATTATCCACAATCATGAGATTTATGTTTTTTAGTTCCTCCAACAGAATAGGAAATTTCAATATTATGTAAGAATTAGCAATCCACTAGATCTAATATTATGTAAGAATTAGCAATCCAGCAGATCTATATTCATATAAGAAACATGAGTGTGAGAGATCTGGAGCATTTTGGTCTTCCATCTTCCTAATTCTTC…
	Genomic sequence	ATGGAAGAGGAGATAGAAACCCCTAGAGATCCGAAGCCATGTGGGCCTTTGGAGGAGTACCGCATTCCAGATTACGTCTTGAGACCAGATGCCCAACAAGTACTTGTTGATCATGCTCCACAGTGTCCTGTATTAGTGTTCATCAATTCTAAATCTGGCGGTCAACTTGGAAGTAGTTTGATCAAAACATACCGTGAACTTCTGAATGAAGCCCAGGTACTTATTCTGTCTTTGGATTTTGAATTTGGAATTGTTGTCAGAGCCACTGAGTTCTTTTTCAGGTTATTGATCTCTCAGAAGAGGCTCCGGATAAGGTTTTGCAGCGTTTATATGTGAATGTTGAAAGGCTCAAGATGGAAGGAGACATTCTTGCCGTTCAAATTTGGAGGACTATGAGAT…
TaDGK6B2	Nucleic acid sequence	ATGCGATCAAGGTCTCGATCGTGCTCGGACTTGTCCATATCATTGTCAGCATCGCCGTCAACATCGGAGCGGGAGGCGCCGAGCTTGCCGCGTTCACCGCCGGCGGCAGGGCAACCGCCGCTTGTTGGTGCTCTGCTTGAGTCTCTCTCGTTTCGGAGTTGCGGATTCGGGCGTGCCTCGTCCTCGGTGTTTGAGAGGCAGGATCTCCGCCTCCGAGTCGCGCTACCGCAACGCCTCCGCGACGCTCTACATGCTGCACTGAGGGCGAGGGACCCGTCGGCAGGCGCCTTCGCATTGAAGGAAGCCCCGGGGATCGGCGACGTGACCAACCCCTGGCTGTCCCTCGCTCCCGAAGACGCCCCCGAGAACCCCCTAGTTGCATTCGTCAACCCACGCAGT…
	Deduced amino acid sequence	MRSRSRSCSDLSISLSASPSTSEREAPSLPRSPPAAGQPPLVGALLESLSFRSCGFGRASSSVFERQDLRLRVALPQRLRDALHAALRARDPSAGAFALKEAPGIGDVTNPWLSLAPEDAPENPLVAFVNPRSGGRLGPVLKSRLQQLIGEDQVFDITIVKPSEFVQYGLGCLEQLADSGDHSARSVRNNLRVMTAGGDGTVGWVLGCLGELYVQNREPVPPVAVIPLGTGNDLSRSFGWGASFPFSWKTAAKRSLYKAILGTVSCLDSWHIVVSMPEEGEKEQELNLPHSLRHLGECTFYDDGTAEGELPETVCCFDGVFYNYFSLGMDAQVAYGFHQLRGDKPFLASGPLSNKLIYAGYTCKQGWFFTQCISDPELRGLTNIIRLSIKKLDSSKWEH…
	Promoter sequence	TGCGGTAGGGGGTTAGCATCCAGCAATTGTGTTTTGCAGTGGTGGAGGAGAGCAAACAATGGGTCGGTTTGAACGGATGAGGTTGGAGAAGCAATAGTTTTATATGGTAGTTCTTTTTGCGGTGGGAAGGAAGGACGAGGAGAAGGGGCTAGCTGCACCGCTCATCAATAGGAAAGGCAGCTTAGGAAATATATAAATAGAAATACCTAAATATAGCATTGCTCCTCACATGCAGCACCACACAATACGAAACAACATACTACTACATATGAGAGAGGGCCAGAGGTTTGATCTTGTCTTCGCAAATGAGCTAAGGTGAGACATGAGGATGGGGCGGAGGCGACCGCGGCTGCGCGGGTTGATGAACGCGATGAGGGGATTCTCGGGGGTGTCGTTGGG…
	Genomic sequence	ATGCGATCAAGGTCTCGATCGTGCTCGGACTTGTCCATATCATTGTCAGCATCGCCGTCAACATCGGAGCGGGAGGCGCCGAGCTTGCCGCGTTCACCGCCGGCGGCAGGGCAACCGCCGCTTGTTGGTGCTCTGCTTGAGTCTCTCTCGTTTCGGAGTTGCGGATTCGGGCGTGCCTCGTCCTCGGTGTTTGAGAGGCAGGATCTCCGCCTCCGAGTCGCGCTACCGCAACGCCTCCGCGACGCTCTACATGCTGCACTGAGGGCGAGGGACCCGTCGGCAGGCGCCTTCGCATTGAAGGAAGCCCCGGGGATCGGCGACGTGACCAACCCCTGGCTGTCCCTCGCTCCCGAAGACGCCCCCGAGAACCCCCTAGTTGCATTCGTCAACCCACGCAGT…
TaDGK7A	Nucleic acid sequence	ATGCGATCGCGGTCGCGGTCGTGCTCGGAGATGTCCATATCGCTATCGGCATCACCGTCGCCGGCGGAGCGGGAGGCGCTGCGCTTGCCGCGTTCACCGCCGGCGGCCGCGCCGCCGCCGCTGGTTGGGGCTCTTATTGAGTCGCTGTCATTTCGGAGCTGTGGGTTCGGCCGCGCCGCGTCCTCGGTGTTCGAGAAGGAGGACCTCCGCCTCCGGGTCGCGCTTCCGCAGCGCCTCCGCGACGCTCTGCACGCCGCGCTGAAGGCGAGGGACCCGTCGGCAGGCGCCTTCGCGTTGGAGGAAGCCCCGGGGGTCGGCACCGCGGCCAACCCCTGGTTCGCCCTTGCGCCCGAGGACGCTCCCGAGAACCCCCTGGTCGCGTTCGTCAACCCGCGTAGC…
	Deduced amino acid sequence	MRSRSRSCSEMSISLSASPSPAEREALRLPRSPPAAAPPPLVGALIESLSFRSCGFGRAASSVFEKEDLRLRVALPQRLRDALHAALKARDPSAGAFALEEAPGVGTAANPWFALAPEDAPENPLVAFVNPRSGGRLGPVLKSRLQELIGEDQVFDITVVKPSAFVEYGLGCLEQLADSGYHSARSVRNNLRVMVAGGDGTVGWVLGCLGELYVQNRGPVPPVAVIPLGTGNDLSRSFGWGASFPFSWKAAAKRSLYKAILGTVSCLDSWHIVVSMPEEGEEQELDLPHSLRHLGECTFYDDGTAEGELAETVCCFDGVFYNYFSIGMDAQVAYGFHQLRDEKPFLASGPLSNKLIYAGYTCKQGWFFTQCISDPELRGLTNIIRLSIKKMDSSEWEHI…
	Promoter sequence	CGCGATCGAGGGTTAGGATCTAGAAAATGCGTTTTCCGGTGATGGGCGGTTTGAATGGAGAAGGCTGAAGGAGGCGGAGTTTTGTATGGTCGTTTTTTCCTGCGATGGGAAGGAGGGCCGAGGAGAAGAGCTGCCTGCACCGCTCCTCAACGGGCAAGGCAGCTCAGGAAATAGCTAAAGAGTAATCCTATATTTACGGAGAAAAGAGATTCACCGTGCATCTCTCAGCCGTCCATTCCATTGAAAATCCACATGCCTACATGCTTATTTTCTTTGGTTGTTTAGCCGTTAGTTAATTTTAAATGGCTTCATGCATTTTTTTCGCGCAACAAAGAAATGGCTCCATACATGCATGCTTTTGCCATTGAGTTCGATGCGACATCTATTCCATCTCTCATG…
	Genomic sequence	ATGCGATCGCGGTCGCGGTCGTGCTCGGAGATGTCCATATCGCTATCGGCATCACCGTCGCCGGCGGAGCGGGAGGCGCTGCGCTTGCCGCGTTCACCGCCGGCGGCCGCGCCGCCGCCGCTGGTTGGGGCTCTTATTGAGTCGCTGTCATTTCGGAGCTGTGGGTTCGGCCGCGCCGCGTCCTCGGTGTTCGAGAAGGAGGACCTCCGCCTCCGGGTCGCGCTTCCGCAGCGCCTCCGCGACGCTCTGCACGCCGCGCTGAAGGCGAGGGACCCGTCGGCAGGCGCCTTCGCGTTGGAGGAAGCCCCGGGGGTCGGCACCGCGGCCAACCCCTGGTTCGCCCTTGCGCCCGAGGACGCTCCCGAGAACCCCCTGGTCGCGTTCGTCAACCCGCGTAGC…
TaDGK7B	Nucleic acid sequence	ATGCGATCGCGGACGCGGTCGTGCTCGGAGATGTCCATATCACTGTCGGCATCACCGTCGCCGGCGGAGCGGGAGGCGCTTCGCTTGTCGCGCTCACCGCCGACGGCCGCGTCACCGCCGCTGGTTGGGGCTCTTATTGAGTCACTGTCATTCGGGAGCTGTGGGTTCGGCCGCGCCGCGTCCTCGGCGTTCGAGAAGGAGGACCTTCGCCTCCGCATCGCACTTCCGCAGCGCCTTCGCGACGCTCTGCACGCCGCGCTGAAGGCGAGGGACCCGTCGGCAAGCGCCTTCACGTTGGAGGAAGCCCCGGGGGTCGGCACCGCGGCCAACCCTTGGTTCGCCCTGGCGCCCGAGGACGCCCCCGAGAACCCCCTGGTTGCGCTCGTCAACCCGCGTAGC…
	Deduced amino acid sequence	MRSRTRSCSEMSISLSASPSPAEREALRLSRSPPTAASPPLVGALIESLSFGSCGFGRAASSAFEKEDLRLRIALPQRLRDALHAALKARDPSASAFTLEEAPGVGTAANPWFALAPEDAPENPLVALVNPRSGGRLGPVLKSRLQELIGEDQVFDITVVKPSAFVEYGLGCLEQLADYGDHSARSVRNNLRVMVAGGDGTVGWVLGCLGELYVQNRGPVPPVAVIPLGTGNDLSRSFGWGASFPFSWKAAAKRSLYKAILGTVSCLDSWHIVVSMPEEGEEQELDLPHSLRHLGECTFYDDGTAEGELAETVCCFDDVFYNYFSIGMDAQVAYGFHQLRDEKPFLASGPLSNKLIYAGYTCKQGWFFTQCISDPELRGLTNIIRLSIKKMDSSEWEHI…
	Promoter sequence	TTGTTGTCAGAAGAGTTCCAGAAAAAGGCCCACCTATGCTTGTCGAAACCAACATGAATCCCTCCAGACAGGAGATAAAAGCCCATTAGAAACATTGGGAGGGAGGATAGACAAGCATTAGTAAGGGCAACCTTGCCCGCCTGAGAATTATAGCGACCTCTCCATGATAGAACCCTGTTCCCTACTTTGGTCACTATCGGAGCGAAGTCCTTAGCCAAGAGCTTAAGAGGGGAGATAGGGAGGCCCATGTATTTTAAAGGGAACGAGCCAAGGGAACAATTCAGAAGATGCGCCACTCTCTGGGCTTCAGAATCAGAGACCCCACTCACAATAACTTCGCTCTTCGAAAAGTTGATTTTAAGGCCAGATAACGCTTCGAAGCACATGAGGAGGAATTCC…
	Genomic sequence	ATGCGATCGCGGACGCGGTCGTGCTCGGAGATGTCCATATCACTGTCGGCATCACCGTCGCCGGCGGAGCGGGAGGCGCTTCGCTTGTCGCGCTCACCGCCGACGGCCGCGTCACCGCCGCTGGTTGGGGCTCTTATTGAGTCACTGTCATTCGGGAGCTGTGGGTTCGGCCGCGCCGCGTCCTCGGCGTTCGAGAAGGAGGACCTTCGCCTCCGCATCGCACTTCCGCAGCGCCTTCGCGACGCTCTGCACGCCGCGCTGAAGGCGAGGGACCCGTCGGCAAGCGCCTTCACGTTGGAGGAAGCCCCGGGGGTCGGCACCGCGGCCAACCCTTGGTTCGCCCTGGCGCCCGAGGACGCCCCCGAGAACCCCCTGGTTGCGCTCGTCAACCCGCGTAGC…
TaDGK7D	Nucleic acid sequence	ATGCGATCGCGGTCGCGGTCGTGCTCGGAGATGTCCATATCGCTGTCGGCATCACCGTCGCCGGCGGAGCGGGAGGCGCTGCGCTTGCCGCGCTCACCGCCGGCGGCCGCGCCGCCGCCGCTAGTTGGGGCTCTTATTGAGTCGCTGTCATTCCGGAGCTGCGGGTTCGGCCGTGCCGCGTCCTCGGCGTTCGAGAAGGAGGACCTCCGCCTCCGCGTCGCGCTTCCGCAGCGCCTCCGCGACGCTCTGCACGCCGCGCTGAAGGCGAGGGACCCGTCGGCAGGCGCCTTCGCGTTGGAGGAAGCCCCAGGGGTGGGCACCGCGGCCAACCCCTGGTTCGCCCTGGCGCCCGAGGACGCCCCCGAGAACCCCCTGGTCGCGTTCGTCAACCCGCGCAGC…
	Deduced amino acid sequence	MRSRSRSCSEMSISLSASPSPAEREALRLPRSPPAAAPPPLVGALIESLSFRSCGFGRAASSAFEKEDLRLRVALPQRLRDALHAALKARDPSAGAFALEEAPGVGTAANPWFALAPEDAPENPLVAFVNPRSGGRLGPVLKSRLQELIGEDQVFDITVVKPSAFVEYGLGCLEQLADSGDHSARSVRNNLRVMVAGGDGTVGWVLGCLGELYVQNRGPVPPVAVIPLGTGNDLSRSFGWGASFPFSWKAAAKRSLYKAILGTVSCLDSWHIVVSMPEEGEEQELDLPHSLRHLGECTFYDDGTAEGELSETVCCFDGVFYNYFSIGMDAQVAYGFHQLRDEKPFLASGPLSNKLIYAGYTCKQGWFFTQCISDPELRGLTNIIRLSIKKMDSSEWEHI…
	Promoter sequence	CGCGATCGGGGGGTAGGATCCAGGAAATGCGTTTTCCGATGGTGGGCGGTTTGAACGGAGGAGGCTGAAGGAGGCGGAGTTTTGTATGGTCGTTTTTTTCCGTGGTGGGAAGGAGGGCCAAGGAGGAGCTGCCTGCACCGCTCCTCAACGGCCAAGGCAACTCAGGAAATAGCTAAAGAGCAATCCTATATTTACGGAGAAAAGAGATTCTCCGTGCATGTCTCAGCCGTCCATTCCATTGAAAATCCACATGCCTACATGCTTATTTTCTTTGGTTGTTTAGCCGTTAGTTAATTTTAAATGGCTTCATGCATTTTTTTTTCACGCAACAAGGAAATGGCTCCATACATGCATGCTTTTGCCATTGAGTTCAATGCGACATCTATTCCATCTCTCATG…
	Genomic sequence	ATGCGATCGCGGTCGCGGTCGTGCTCGGAGATGTCCATATCGCTGTCGGCATCACCGTCGCCGGCGGAGCGGGAGGCGCTGCGCTTGCCGCGCTCACCGCCGGCGGCCGCGCCGCCGCCGCTAGTTGGGGCTCTTATTGAGTCGCTGTCATTCCGGAGCTGCGGGTTCGGCCGTGCCGCGTCCTCGGCGTTCGAGAAGGAGGACCTCCGCCTCCGCGTCGCGCTTCCGCAGCGCCTCCGCGACGCTCTGCACGCCGCGCTGAAGGCGAGGGACCCGTCGGCAGGCGCCTTCGCGTTGGAGGAAGCCCCAGGGGTGGGCACCGCGGCCAACCCCTGGTTCGCCCTGGCGCCCGAGGACGCCCCCGAGAACCCCCTGGTCGCGTTCGTCAACCCGCGCAGC…
