# Supplementary material for: Genomic profiling and expression analysis of the diacylglycerol kinase gene family in heterologous hexaploid wheat
Source: PeerJ. 2021 Dec 14;9:e12480. doi: 10.7717/peerj.12480 (PMC8679913; doi:10.7717/peerj.12480)
Supplement: Supplemental Information 11 — Characterization of the wheat (Triticum aestivum L.) genome data transcript identifiers (IDs) with gene names, gene loci, gene identifiers, chromosome (Chr), localization coordinates, ORF length (bp), isoelectric point (pI), protein identifiers, protein lengths (amino acids; aa), and protein weights (kDa). [file peerj-09-12480-s011.xlsx]

## Sheet: Sheet1
Table S4 Properties of DGKs identified from wheat genome.
Gene name	NCBI number	Gene ID	Chromosomal locationa	ORF(bp)	proteinb
					Size (aa)	MW(kDa)	PI
TaDGK1A	KAF6984428.1	TraesCS1A02G235100	Chromosome 1A: 415,580,733-415,585,379	2166	721	80.33	6.5
TaDGK1B	KAF6989925.1	TraesCS1B02G248300	Chromosome 1B: 439,429,089-439,433,460	2166	721	80.15	6.78
TaDGK1D	KAF6995613.1	TraesCS1D02G236800	Chromosome 1D: 326,145,312-326,154,456	2166	721	80.22	6.35
TaDGK2A	KAF7004576.1	TraesCS2A02G532800	Chromosome 2A: 748,963,953-748,969,366	1494	497	54.8	6.56
TaDGK2B	KAF7011950.1	TraesCS2B02G562300	Chromosome 2B: 754,663,266-754,667,763	1497	498	55.07	6.47
TaDGK2D	KAF7019302.1	TraesCS2D02G534600	Chromosome 2D: 618,149,270-618,154,672	1497	498	55.01	6.56
TaDGK3A	KAF7024027.1	TraesCS3A02G315800	Chromosome 3A: 556,660,572-556,666,920	1470	489	55.07	8.93
TaDGK3B	KAF7031092.1	TraesCS3B02G351100	Chromosome 3B: 561,097,668-561,104,312	1470	489	55.11	9.04
TaDGK3D	KAF7038111.1	TraesCS3D02G315700	Chromosome 3D: 429,099,389-429,106,017	1467	488	55.18	9
TaDGK5A	KAF7057220.1	TraesCS5A02G076300	Chromosome 5A: 92,172,553-92,178,174	2148	715	79.09	6.5
TaDGK5B	KAF7063829.1	TraesCS5B02G082400	Chromosome 5B: 103,316,492-103,321,973	2172	723	79.95	6.7
TaDGK5D	KAF7092610.1	TraesCS5D02G089700	Chromosome 5D: 97,036,729-97,041,067	2172	723	80	6.5
TaDGK5A2	KAF7057607.1	TraesCS5A02G106400	Chromosome 5A: 175,831,813-175,836,746	2124	707	77.95	7.2
TaDGK5B2	KAF7064212.1	TraesCS5B02G110800	Chromosome 5B: 162,771,499-162,776,936	2124	707	78.06	7.45
TaDGK5D2	KAF7071278.1	TraesCS5D02G120500	Chromosome 5D: 170,376,901-170,381,627	2124	707	78.13	6.98
TaDGK6A	KAF7080894.1	TraesCS6A02G347800	Chromosome 6A: 580,196,254-580,203,070	1491	496	54.25	6.9
TaDGK6B	KAF7086390.1	TraesCS6B02G381300	Chromosome 6B: 656,273,611-656,281,007	1509	502	55.17	6.52
TaDGK6B2	KAF7086908.1	TraesCS6B02G428500	Chromosome 6B: 696,429,438-696,482,513	1584	527	57.77	6.4
TaDGK6D	KAF7091572.1	TraesCS6D02G330800	Chromosome 6D: 433,929,693-433,936,738	1515	504	55.34	6.26
TaDGK7A	KAF7095996.1	TraesCS7A02G297200	Chromosome 7A: 398,905,477-398,938,557	1581	526	57.48	5.79
TaDGK7B	KAF7101802.1	TraesCS7B02G198600	Chromosome 7B: 354,241,311-354,289,258	1581	526	57.51	5.59
TaDGK7B2	KAF7103042.1	TraesCS7B02G293200	Chromosome 7B: 530,017,928-530,037,309	1491	496	55.8	6.08
TaDGK7D	KAF7109040.1	TraesCS7D02G291600	Chromosome 7D: 351,563,387-351,594,278	1581	526	57.42	5.7
TaDGK7D2	KAF7110201.1	TraesCS7D02G387000	Chromosome 7D: 501,005,401-501,018,254	1488	495	55.68	5.97
a. Chromosomal location：ChrNo:start - end
b. The Nucleic acid and deduced amino acid sequences of each TaPLC gene are listed in Table S2
