# Supplementary material for: Genomic profiling and expression analysis of the diacylglycerol kinase gene family in heterologous hexaploid wheat
Source: PeerJ. 2021 Dec 14;9:e12480. doi: 10.7717/peerj.12480 (PMC8679913; doi:10.7717/peerj.12480)
Supplement: Supplemental Information 12 [file peerj-09-12480-s012.xlsx]

## Sheet: Sheet1
Table S5 GenBank accession numbers of DGKs used for Phylogenetic analyses
Gene name	NCBI number
AtDGK1	AT5G07920
AtDGK2	AT5G63770
AtDGK3	AT2G18730
AtDGK4	AT5G57690
AtDGK5	AT2G20900
AtDGK6	AT4G28130
AtDGK7	AT4G30340
GmDGK1	XP_003541921.1
GmDGK2	XP_006580353.1
GmDGK3	XP_014632628
GmDGK4	XP_003526295
GmDGK5	XP_014632628
GmDGK6	XP_003552048
GmDGK7	XP_003542286
GmDGK8	XP_014632201
GmDGK9	XP_006592585
GmDGK10	XP_014625529.3
GmDGK11	XP_014625346.1
GmDGK12	XP_006579516
OsDGK1	OS04G54200
OsDGK2	OS08G08110
OsDGK3	OS02G54650
OsDGK4	OS12G38780
OsDGK5	OS03G31180
OsDGK6	OS08G15090
OsDGK7	OS01G57420
OsDGK8	OS12G12260
MdDGK1	KM099881
MdDGK2	KM099882
MdDGK3	EB177954
MdDGK4	GO512216
MdDGK5	KM099880
MdDGK6	GO552958
MdDGK7	KM099883
MdDGK8	DR992213
ZmDGK1	EF088691
ZmDGK2	EF088690
ZmDGK3	EF088692
