# Supplementary material for: Genomic profiling and expression analysis of the diacylglycerol kinase gene family in heterologous hexaploid wheat
Source: PeerJ. 2021 Dec 14;9:e12480. doi: 10.7717/peerj.12480 (PMC8679913; doi:10.7717/peerj.12480)
Supplement: Supplemental Information 13 [file peerj-09-12480-s013.xlsx]

## Sheet: Sheet1
Table S6 Transposable element analyses on the intron of TaDGKs
Gene name	Intron number	Intron Length (bp)	Transposable element type	Start (bp)	End (bp)
TaDGK1D	1	4724	LTR	3162	2013
			LTR	5475	4326
			LTR	6225	5076
TaDGK6B2	1	26504	LTR	4680	6198
			LTR	6200	10841
			LTR	11300	12725
			DNA/EnSpm/CACTA	17020	17423
			DNA/EnSpm/CACTA	19943	20441
			DNA/EnSpm/CACTA	20507	23230
	7	11109	LTR/Copia	34780	35104
			LTR/Gypsy	37105	37272
			LTR/Gypsy	37465	37680
	8	6757	DNA/Mariner	45295	45379
			LTR/Copia	46299	46543
			LTR/Copia	47916	49203
			LTR/Copia	49463	49758
			LTR/Copia	50250	50370
TaDGK7A	1	6178	DNA	424	493
			DNA	948	1284
			DNA/EnSpm/CACTA	5529	5603
	4	6776	LTR	8771	8831
			LTR/Gypsy	9447	9642
			LTR/Copia	9993	10083
			DNA/Mariner	10750	10832
			NonLTR/RTE	11271	13722
			DNA/Mariner	13902	13986
	7	6560	LTR/Copia	16159	16345
			LTR/Copia	16408	16513
			DNA/Mariner	16780	16877
			LTR/Gypsy	17458	17548
			DNA/Mariner	18157	18274
	8	5353	LTR/Copia	18405	18696
			LTR/Copia	19162	19317
			DNA/Mariner	19320	19397
			DNA/Harbinger	19503	19617
			DNA/Harbinger	21842	22056
TaDGK7B	1	10897	NonLTR/L1	2808	3172
			NonLTR/L1	3409	3473
			NonLTR/L1	7379	7534
			DNA/EnSpm/CACTA	10711	10787
	4	4053	NonLTR/RTE	13000	15511
			DNA/Mariner	15918	15996
	7	8702	LTR/Copia	21006	21191
			LTR/Copia	21260	21334
			LTR/Gypsy	22209	22298
			DNA/Mariner	23915	24022
	8	16591	LTR/Copia	31503	31599
			LTR/Copia	32125	33735
			LTR/Copia	33736	39713
			LTR/Copia	39724	41319
			LTR/Copia	41903	42144
			LTR/Copia	42517	42694
			LTR/Copia	42709	42934
			LTR/Copia	43630	43785
			DNA/Mariner	43788	43865
TaDGK7D	1	5274	DNA/Mariner	6922	7006
			NonLTR/L1	7445	9920
	4	4180	DNA/Mariner	6922	7006
			NonLTR/RTE	7445	9920
			DNA/Mariner	10381	10465
	7	6191	LTR/Copia	12581	12907
			LTR/Gypsy	13742	13831
	8	6511	LTR/Copia	20720	20816
			LTR/Copia	21909	22150
			LTR/Copia	22587	22878
			LTR/Copia	23087	23137
			DNA/Mariner	23140	23217
TaDGK7B2	5	14797	LTR/Copia	4277	4573
			LTR/Copia	4711	4804
			LTR/Copia	6486	6629
			LTR/Copia	7668	7725
			LTR/Copia	9973	13499
TaDGK7D2	5	8325	LTR/Copia	4280	4576
			LTR/Copia	4714	4807
			LTR/Copia	6486	6632
			LTR/Copia	7671	7728
