# Supplementary material for: Genomic profiling and expression analysis of the diacylglycerol kinase gene family in heterologous hexaploid wheat
Source: PeerJ. 2021 Dec 14;9:e12480. doi: 10.7717/peerj.12480 (PMC8679913; doi:10.7717/peerj.12480)
Supplement: Supplemental Information 14 [file peerj-09-12480-s014.xlsx]

## Sheet: Sheet1
Table S7 Putative regulatory cis-elements in TaDGK gene promoters.
Classification	Symbol	Cis-element	Sequence*	Description	Reference
Transcription initiation	T	TATA box	TATAAAT	Core cis-element influenced the efficiency of transcription in eucaryote	[1]
	C	CAAT box	CCAAT	Common cis-element in eukaryotic promoter and enhancer regions	[2]
Phytohormone responsiveness	A	ABRE	TACGTG	Abscisic acid (ABA)-responsive element	[3]
	E	ERE	AWTTCAAA	Ethylene-responsive element	[4]
	G	GARE	WAACAR	Gibberellin-responsive element	[5]
	F	TCA-element	TCATCTTCTT	cis-regulatory element involved in the SA-responsiveness	[6]
	B	TGACG-motif	TGACG	cis-regulatory element involved in the MeJA-responsiveness	[7]
	D	TGA-element	AACGAC	Auxin-responsive element	[8]
	U	AuxRE	KGTCCCAT	Auxine responsive element	[9]
Stress responsiveness	W	WUN-motif	TCATTACGAA	Wound-responsive element	[10]
	L	LTR	CCGAAA	cis-acting element involved in low-temperature responsiveness	[11]
	Y	MYB1AT	WAACCA	MYB recognition site involved in dehydration responsiveness	[12]
	M	MYBCORE	CNGTTR	MYB binding site involved in water stress responsiveness	[13]
	S	ASF1MOTIFCAMV	TGACG	abiotic and biotic stress	[14]
	H	HSE	CTNGAANNTTCNAG	Heat shock-responsive element	[15]
	R	G-box	YACGTN	cis-regulatory element involved in light responsiveness	[16]
	O	I-box	GATAWGR	Part of a light responsive element	[17]
	X	W box	TTTGACY	WRKY protein-specific binding site, responsive to pathogen infection	[18]
*N—A, C, G or T; K—G or T; R—A or G; W—A or T; Y—C or T
Reference
[1] Grace ML, Chandrasekharan MB, Hall TC, Crowe AJ. Sequence and spacing of TATA box elements are critical for accurate initiation from the beta-phaseolin promoter. The Journal of biological chemistry. 2004;279(9):8102-10. .
[2] Vauterin M, Frankard V, Jacobs M. The Arabidopsis thaliana dhdps gene encoding dihydrodipicolinate synthase, key enzyme of lysine biosynthesis, is expressed in a cell-specific manner. Plant molecular biology. 1999;39(4):695-708.
[3] Baker SS, Wilhelm KS, Thomashow MF. The 5'-region of Arabidopsis thaliana cor15a has cis-acting elements that confer cold-, drought- and ABA-regulated gene expression. Plant molecular biology. 1994;24(5):701-13.
[4] Itzhaki H, Woodson WR. Characterization of an ethylene-responsive glutathione S-transferase gene cluster in carnation. Plant molecular biology. 1993;22(1):43-58.
[5] Pastuglia M, Roby D, Dumas C, Cock JM. Rapid induction by wounding and bacterial infection of an S gene family receptor-like kinase gene in Brassica oleracea. Plant Cell. 1997;9(1):49-60.
[6] Goldsbrough A P, Albrecht H, Stratford R. Salicylic acid-inducible binding of a tobacco nuclear protein to a 10 bp sequence which is highly conserved amongst stress-inducible genes. Plant J,1993, 3(4):563-571.
[7] Rouster J, Leah R, Mundy J, Cameron-Mills V. Identification of a methyl jasmonate-responsive region in the promoter of a lipoxygenase 1 gene expressed in barley grain. The Plant journal : for cell and molecular biology. 1997;11(3):513-23.
[8] Nagao RT, Goekjian VH, Hong JC, Key JL. Identification of protein-binding DNA sequences in an auxin-regulated gene of soybean. Plant molecular biology. 1993;21(6):1147-62.
[9] Ballas N, Wong LM, Theologis A. Identification of the auxin-responsive element, AuxRE, in the primary indoleacetic acid-inducible gene, PS-IAA4/5, of pea (Pisum sativum). J Mol Biol. 1993; 233:580-596.
[10] Dang HQ, Tran NQ, Tuteja R, Tuteja N. Promoter of a salinity and cold stress-induced MCM6 DNA helicase from pea. Plant signaling & behavior. 2011;6(7):1006-8.
[11] Yamaguchi-Shinozaki K, Shinozaki K. A novel cis-acting element in an Arabidopsis gene is involved in responsiveness to drought, low-temperature, or high-salt stress. Plant Cell. 1994;6(2):251-64.
[12] Abe H, Urao T, Ito T, Seki M, Shinozaki K, Yamaguchi-Shinozaki K. Arabidopsis AtMYC2 (bHLH) and AtMYB2 (MYB) function as transcriptional activators in abscisic acid signaling. Plant Cell. 2003;15(1): 63-78 .
[13] Urao T, Yamaguchi-Shinozaki K, Urao S, Shinozaki K. An Arabidopsis myb homolog is induced by dehydration stress and its gene product binds to the conserved MYB recognition sequence. Plant Cell. 1993; 5(11):1529-1539 .
[14] Despres C, Chubak C, Rochon A, Clark R, Bethune T, Desveaux D, Fobert PR. The Arabidopsis NPR1 disease resistance protein is a novel cofactor that confers redox regulation of DNA binding activity to the basic domain/leucine zipper transcription factor TGA1. Plant Cell. 2003; 15(9): 2181-2191.
[15] Gurley WB, Czarnecka E, Nagao RT, Key JL. Upstream sequences required for efficient expression of a soybean heat shock gene. Molecular and cellular biology. 1986;6(2):559-65.
[16] Williams ME, Foster R, Chua NH. Sequences flanking the hexameric G-box core CACGTG affect the specificity of protein binding. Plant Cell. 1992;4(4):485-96. Epub 1992/04/01. doi: 10.1105/tpc.4.4.485. PubMed PMID: 1498606; PubMed Central PMCID: PMC160147.
[17] Giuliano G, Pichersky E, Malik VS, Timko MP, Scolnik PA, Cashmore AR. An evolutionarily conserved protein binding sequence upstream of a plant light-regulated gene. Proceedings of the National Academy of Sciences of the United States of America. 1988;85(19):7089-93. Epub 1988/10/01. PubMed PMID: 2902624; PubMed Central PMCID: PMC282129.
[18] Eulgem T, Rushton PJ, Robatzek S, Somssich IE. The WRKY superfamily of plant transcription factors. Trends in plant science. 2000;5(5):199-206. Epub 2000/04/29. PubMed PMID: 10785665.
