# Supplementary material for: Genomic profiling and expression analysis of the diacylglycerol kinase gene family in heterologous hexaploid wheat
Source: PeerJ. 2021 Dec 14;9:e12480. doi: 10.7717/peerj.12480 (PMC8679913; doi:10.7717/peerj.12480)
Supplement: Supplemental Information 15 [file peerj-09-12480-s015.xlsx]

## Sheet: cold treatment
Table S8A Expression of TaDGK genes under cold stress
	TraesCS1A02G235100			TraesCS1B02G248300			TraesCS1D02G236800			TraesCS2A02G532800			TraesCS2B02G562300			TraesCS2D02G534600			TraesCS3A02G315800			TraesCS3B02G351100			TraesCS3D02G315700			TraesCS5A02G076300			TraesCS5B02G082400			TraesCS5D02G089700			TraesCS5A02G106400			TraesCS5B02G110800			TraesCS5D02G120500			TraesCS6A02G347800			TraesCS6B02G381300
	TaDGK1A	low	high	TaDGK1B	low	high	TaDGK1D	low	high	TaDGK2A	low	high	TaDGK2B	low	high	TaDGK2D	low	high	TaDGK3A	low	high	TaDGK3B	low	high	TaDGK3D	low	high	TaDGK5A	low	high	TaDGK5B	low	high	TaDGK5D	low	high	TaDGK5A2	low	high	TaDGK5B2	low	high	TaDGK5D2	low	high	TaDGK6A	low	high	TaDGK6B
23℃	0.167329	0.140868	0.19379	0.702084	0.613999	0.790169	0.457952	0.347093	0.568811	8.41669	7.18092	9.65246	11.5234	10.3382	12.7086	6.60817	5.93828	7.27806	1.26584	0.921573	1.61011	1.36733	1.19216	1.5425	3.46633	3.14949	3.78317	3.21549	3.01961	3.41137	3.56091	3.23075	3.89106	4.24063	3.57472	4.90654	1.38643	1.11145	1.66141	1.6384	1.34766	1.92914	1.22174	0.938509	1.50497	0.389489	0.341393	0.437585	9.28604
4℃	1.95685	1.67582	2.23788	2.31184	2.18743	2.43625	1.90019	1.77291	2.02747	7.64494	6.81794	8.47194	11.2396	10.9288	11.5504	25.732	24.8776	26.5864	1.07956	0.948377	1.21074	1.70437	1.51072	1.89802	7.92933	7.52945	8.3292	4.49918	4.34013	4.65823	5.4541	5.10697	5.80123	7.7254	7.32568	8.12512	1.84307	1.57371	2.11243	1.98786	1.94286	2.03286	2.11959	1.98345	2.25573	0.266119	0.240451	0.291787	12.6447
Tissue: 8-week-old leaf
International Wheat Genome Sequencing Consortium (IWGSC). 2014. A chromosome-based draft sequence of the hexaploid bread wheat (Triticum aestivum) genome. Science 345: 1251788.
[truncated: 23 more columns]

## Sheet: GA and JA treatment
Table S8B Expression of TaDGK genes under GA and JA treatment
	TraesCS1A02G235100			TraesCS1B02G248300			TraesCS1D02G236800			TraesCS2A02G532800			TraesCS2B02G562300			TraesCS2D02G534600			TraesCS3A02G315800			TraesCS3B02G351100			TraesCS3D02G315700			TraesCS5A02G076300			TraesCS5B02G082400			TraesCS5D02G089700			TraesCS5A02G106400			TraesCS5B02G110800			TraesCS5D02G120500			TraesCS6A02G347800			TraesCS6B02G381300
	TaDGK1A	low	high	TaDGK1B	low	high	TaDGK1D	low	high	TaDGK2A	low	high	TaDGK2B	low	high	TaDGK2D	low	high	TaDGK3A	low	high	TaDGK3B	low	high	TaDGK3D	low	high	TaDGK5A	low	high	TaDGK5B	low	high	TaDGK5D	low	high	TaDGK5A2	low	high	TaDGK5B2	low	high	TaDGK5D2	low	high	TaDGK6A	low	high	TaDGK6B
DMSO_1h	0.908416	0.747959	1.06887	0.740579	0.668487	0.812671	1.41668	1.20069	1.63267	14.1759	12.5304	15.8214	16.3226	15.3943	17.2509	1.87568	1.80567	1.94569	2.88601	2.65189	3.12013	3.6275	2.69017	4.56483	5.93495	5.52773	6.34217	1.73012	1.5957	1.86454	1.56072	1.35023	1.77121	2.07104	1.77533	2.36675	0.564111	0.522636	0.605586	0.907631	0.688482	1.12678	0.534711	0.521123	0.548299	13.644	13.0038	14.2842	12.4062
GA_1h	0.263277	0.234362	0.292192	0.363502	0.325505	0.401499	0.499283	0.327962	0.670604	11.2589	9.54606	12.9717	10.9683	8.47699	13.4596	1.04273	0.903762	1.1817	0.931998	0.565709	1.29829	1.88368	1.57252	2.19484	4.10425	3.15733	5.05117	0.892092	0.838401	0.945783	1.04125	0.75942	1.32308	0.759973	0.592695	0.927251	0.364583	0.313753	0.415413	0.402389	0.245664	0.559114	0.333574	0.179268	0.48788	6.27062	6.0039	6.53734	6.27217
JA_1h	0.842987	0.801515	0.884459	0.829603	0.738206	0.921	2.09506	1.92655	2.26357	15.9482	14.8929	17.0035	15.7227	14.7465	16.6989	2.36184	1.94444	2.77924	3.18814	2.31776	4.05853	3.30212	3.1935	3.41074	5.80092	5.20541	6.39643	1.78366	1.55849	2.00883	1.73402	1.46684	2.0012	2.08544	1.77347	2.39741	0.591461	0.438372	0.74455	0.645398	0.524021	0.766775	0.34455	0.209731	0.479369	13.7699	13.04	14.4998	9.77071
Tissue: mature leaves of 2-month
Chen Y, Yan Y, Wu TT, Zhang GL, Yin H, Chen W, Wang S, Chang F, Gou JY. 2020. Cloning of wheat keto-acyl thiolase 2B reveals a role of jasmonic acid in grain weight determination. Nature communications 11: 6266.
[truncated: 23 more columns]

## Sheet: 6BA, ABA and SA treatment
Table S8C Expression of TaDGK genes under 6BA, ABA and SA treatment
	TraesCS1A02G235100			TraesCS1B02G248300			TraesCS1D02G236800			TraesCS2A02G532800			TraesCS2B02G562300			TraesCS2D02G534600			TraesCS3A02G315800			TraesCS3B02G351100			TraesCS3D02G315700			TraesCS5A02G076300			TraesCS5B02G082400			TraesCS5D02G089700			TraesCS5A02G106400			TraesCS5B02G110800			TraesCS5D02G120500			TraesCS6A02G347800			TraesCS6B02G381300
	TaDGK1A	low	high	TaDGK1B	low	high	TaDGK1D	low	high	TaDGK2A	low	high	TaDGK2B	low	high	TaDGK2D	low	high	TaDGK3A	low	high	TaDGK3B	low	high	TaDGK3D	low	high	TaDGK5A	low	high	TaDGK5B	low	high	TaDGK5D	low	high	TaDGK5A2	low	high	TaDGK5B2	low	high	TaDGK5D2	low	high	TaDGK6A	low	high	TaDGK6B
DMSO_3h	0.920554	0.788461	1.05265	0.866629	0.81353	0.919728	1.64914	1.56314	1.73514	17.6382	15.0495	20.2268	18.5542	16.9072	20.2012	1.80474	1.47199	2.13749	2.32523	2.01745	2.63301	2.60415	2.45162	2.75668	4.51233	4.04117	4.98349	1.46253	1.14652	1.77854	1.19027	0.931374	1.44917	1.54537	1.17897	1.91177	0.285688	0.274912	0.296464	0.350003	0.275409	0.424597	0.067071	0.04016	0.093982	13.8805	13.2193	14.5417	10.0058
6BA_3h	0.901642	0.622875	1.18041	0.565953	0.262611	0.869295	1.44765	0.990741	1.90456	13.669	9.52968	17.8083	17.0946	11.3208	22.8684	1.22686	0.740035	1.71368	0.580558	0.379257	0.781859	1.63362	1.2232	2.04404	2.07259	1.62565	2.51953	1.30525	0.784969	1.82553	1.14386	0.727753	1.55997	1.76268	1.08077	2.44459	0.643952	0.365248	0.922656	0.455753	0.299094	0.612412	0.332856	0.183687	0.482025	10.2566	7.67663	12.8366	8.14694
ABA_3h	0.196227	-0.06236	0.454814	0.273692	0.076525	0.470859	0.412201	0.089793	0.734609	2.83929	0.61175	5.06683	2.70084	0.67128	4.7304	0.43043	0.162601	0.698259	0.362095	0.062729	0.661461	0.435323	-0.075107	0.945753	0.635699	0.128536	1.14286	0.222684	-0.000611	0.445979	0.271599	0.104411	0.438787	0.288602	0.080391	0.496813	0.088204	0.025367	0.151041	0.064668	0.015557	0.113779	0.068538	0.034067	0.103009	1.74652	0.34129	3.15175	1.2391
SA_3h	0.646643	0.373752	0.919534	0.749204	0.631203	0.867205	1.4965	0.954379	2.03862	9.84673	6.43269	13.2608	13.9763	9.4844	18.4682	1.08979	0.688367	1.49121	2.7847	2.12482	3.44458	2.61002	1.46646	3.75358	5.41206	3.73693	7.08719	1.35907	0.876109	1.84203	1.03412	0.705927	1.36231	1.55675	1.17499	1.93851	0.58342	0.381723	0.785117	0.536512	0.211909	0.861115	0.44991	0.317285	0.582535	8.73082	5.47137	11.9903	6.34115
Tissue: mature leaves of 2-month
Chen Y, Yan Y, Wu TT, Zhang GL, Yin H, Chen W, Wang S, Chang F, Gou JY. 2020. Cloning of wheat keto-acyl thiolase 2B reveals a role of jasmonic acid in grain weight determination. Nature communications 11: 6266.
[truncated: 23 more columns]

## Sheet: drought and heat treatment
Table S8D Expression of TaDGK genes under drought and heat treatment
	TraesCS1A02G235100			TraesCS1B02G248300			TraesCS1D02G236800			TraesCS2A02G532800			TraesCS2B02G562300			TraesCS2D02G534600			TraesCS3A02G315800			TraesCS3B02G351100			TraesCS3D02G315700			TraesCS5A02G076300			TraesCS5B02G082400			TraesCS5D02G089700			TraesCS5A02G106400			TraesCS5B02G110800			TraesCS5D02G120500			TraesCS6A02G347800			TraesCS6B02G381300
	TaDGK1A	low	high	TaDGK1B	low	high	TaDGK1D	low	high	TaDGK2A	low	high	TaDGK2B	low	high	TaDGK2D	low	high	TaDGK3A	low	high	TaDGK3B	low	high	TaDGK3D	low	high	TaDGK5A	low	high	TaDGK5B	low	high	TaDGK5D	low	high	TaDGK5A2	low	high	TaDGK5B2	low	high	TaDGK5D2	low	high	TaDGK6A	low	high	TaDGK6B
Control	0.31217	0.298059	0.326281	0.307424	0.23737	0.377478	0.796795	0.708387	0.885203	6.61674	5.91592	7.31756	10.1511	9.12683	11.1754	6.91942	6.15453	7.68431	0.32307	0.25238	0.39376	0.714726	0.557275	0.872177	2.15554	2.1489	2.16218	2.04445	1.76882	2.32008	1.74923	1.56666	1.9318	1.86659	1.81254	1.92064	1.15194	1.04089	1.26299	0.986082	0.979288	0.992876	0.884026	0.772748	0.995304	9.24295	7.78171	10.7042	7.08289
Drought_6h	12.1984	11.8166	12.5802	7.79805	7.68509	7.91101	13.1449	12.9625	13.3273	3.82994	3.73965	3.92023	5.21911	5.08622	5.352	3.4481	3.42454	3.47166	2.99999	2.90254	3.09744	4.63453	4.62904	4.64002	15.9394	15.2696	16.6092	1.49931	1.44859	1.55003	1.23099	1.21625	1.24573	1.15617	1.10167	1.21067	1.06006	0.963856	1.15626	1.01323	1.00374	1.02272	0.912269	0.820541	1.004	3.7871	3.67687	3.89733	4.28248
Heat_6h	0.753602	0.717587	0.789617	0.385553	0.312533	0.458573	1.40871	1.34994	1.46748	4.31113	3.9999	4.62236	4.7127	4.66919	4.75621	4.11015	3.99314	4.22716	3.02027	3.01136	3.02918	3.00464	2.88658	3.1227	15.7856	15.5942	15.977	7.41525	7.24306	7.58744	6.14966	6.142	6.15732	7.94366	7.2788	8.60852	1.5391	1.47885	1.59935	0.908663	0.907579	0.909747	0.463956	0.457233	0.470679	7.07967	7.06205	7.09729	6.061
Drought&Heat_6h	0.959402	0.868803	1.05	0.553006	0.462322	0.64369	1.95734	1.65337	2.26131	2.76356	2.5427	2.98442	2.85876	2.85532	2.8622	2.2515	1.93213	2.57087	3.65545	3.65366	3.65724	5.11609	4.94879	5.28338	28.7246	26.7682	30.681	5.44135	4.80136	6.08134	5.11052	4.91161	5.30943	7.50493	7.17483	7.83503	0.71592	0.637596	0.794244	0.681375	0.666842	0.695908	0.324182	0.323631	0.324733	5.57465	4.55045	6.59885	4.04879
Tissue: leaf tissues
Liu Z, Xin M, Qin J, Peng H, Ni Z, Yao Y, Sun Q. 2015. Temporal transcriptome profiling reveals expression partitioning of homeologous genes contributing to heat and drought acclimation in wheat (Triticum aestivum L.). BMC plant biology 15: 152.
[truncated: 23 more columns]

## Sheet: tissues
Table S8E Expression of TaDGK genes in different tissues
	TraesCS1A02G235100			TraesCS1B02G248300			TraesCS1D02G236800			TraesCS2A02G532800			TraesCS2B02G562300			TraesCS2D02G534600			TraesCS3A02G315800			TraesCS3B02G351100			TraesCS3D02G315700			TraesCS5A02G076300			TraesCS5B02G082400			TraesCS5D02G089700			TraesCS5A02G106400			TraesCS5B02G110800			TraesCS5D02G120500			TraesCS6A02G347800			TraesCS6B02G381300
	TaDGK1A	low	high	TaDGK1B	low	high	TaDGK1D	low	high	TaDGK2A	low	high	TaDGK2B	low	high	TaDGK2D	low	high	TaDGK3A	low	high	TaDGK3B	low	high	TaDGK3D	low	high	TaDGK5A	low	high	TaDGK5B	low	high	TaDGK5D	low	high	TaDGK5A2	low	high	TaDGK5B2	low	high	TaDGK5D2	low	high	TaDGK6A	low	high	TaDGK6B
root	0.418424	0.294194	0.542654	0.377904	0.299192	0.456616	1.46548	1.34935	1.58161	18.4948	16.5672	20.4225	25.0342	22.5399	27.5285	19.4802	16.8981	22.0623	4.33335	3.42649	5.24022	4.2286	3.82787	4.62933	7.67446	6.49676	8.85216	5.91492	5.39323	6.43661	4.9016	4.30356	5.49963	12.7964	10.8835	14.7093	4.13584	3.58987	4.68181	3.95216	3.40514	4.49918	4.32882	3.95076	4.70688	21.342	18.3376	24.3464	21.9825
stem	0.182044	-0.004571	0.368659	0.330782	0.292113	0.369451	0.644496	0.076173	1.21282	9.90114	4.09544	15.7068	13.5205	5.81282	21.2282	14.2711	10.1467	18.3955	3.98151	3.56537	4.39765	2.71308	1.62312	3.80304	7.45967	6.04572	8.87362	4.33891	3.20243	5.47539	3.32298	2.33449	4.31147	7.48667	4.08546	10.8879	2.55948	1.37525	3.74371	2.39469	1.27647	3.51291	2.62822	1.38802	3.86842	16.8633	12.8772	20.8494	14.6294
leaf	0.098123	0.092088	0.104158	0.111754	0.092985	0.130523	0.175211	0.159696	0.190726	1.93058	1.82886	2.0323	2.28273	2.08906	2.4764	2.57318	2.47957	2.66679	1.98325	1.89486	2.07164	0.668551	0.632679	0.704423	2.65784	2.55508	2.7606	0.703347	0.655953	0.750741	0.577953	0.509507	0.646399	0.96356	0.908206	1.01891	0.333992	0.28802	0.379964	0.480176	0.444933	0.515419	0.199323	0.150146	0.2485	6.75686	6.50917	7.00455	4.4256
spike	0.119969	0.080561	0.159377	0.175739	0.14872	0.202758	0.263444	0.242484	0.284404	8.2678	8.08192	8.45368	10.1257	9.91417	10.3372	8.73646	8.5598	8.91312	3.9277	3.68964	4.16576	4.68742	4.542	4.83284	6.20743	5.922	6.49286	3.14808	3.06645	3.22971	2.53519	2.39263	2.67774	5.15047	4.93514	5.3658	1.63764	1.52083	1.75445	1.39624	1.35052	1.44196	1.78573	1.69987	1.87159	8.34911	8.12934	8.56888	6.90633
grain	1.54734	1.27813	1.81655	1.58042	1.25303	1.90781	2.11689	1.70012	2.53366	9.17251	7.78586	10.5592	11.1105	9.17227	13.0487	11.2791	9.84986	12.7083	5.45367	4.75536	6.15198	4.95231	4.23866	5.66596	11.655	10.4655	12.8445	3.92837	3.29296	4.56379	3.4219	2.99565	3.84815	6.53025	5.59497	7.46553	2.23708	1.84272	2.63144	2.3845	1.86896	2.90003	1.73984	1.57774	1.90194	7.42451	6.096	8.75302	6.01639
International Wheat Genome Sequencing Consortium (IWGSC). 2014. A chromosome-based draft sequence of the hexaploid bread wheat (Triticum aestivum) genome. Science 345: 1251788.
[truncated: 23 more columns]
