# Supplementary material for: Genomic profiling and expression analysis of the diacylglycerol kinase gene family in heterologous hexaploid wheat
Source: PeerJ. 2021 Dec 14;9:e12480. doi: 10.7717/peerj.12480 (PMC8679913; doi:10.7717/peerj.12480)
Supplement: Supplemental Information 16 [file peerj-09-12480-s016.xlsx]

## Sheet: Sheet1
Table S9 Subcellular location and trans-membrane region of TaDGKs.
Gene name	Subcellular Localization a	Trans-membrane region
TaDGK1A	nucl: 4.5, chlo: 4, cysk_nucl: 3, vacu: 2, mito: 1, plas: 1	1
TaDGK1B	chlo: 5, nucl: 4.5, cysk_nucl: 3, mito: 1, plas: 1, vacu: 1	1
TaDGK1D	nucl: 4.5, chlo: 4, cysk_nucl: 3, vacu: 2, mito: 1, plas: 1	1
TaDGK2A	nucl: 12, cyto: 2	0
TaDGK2B	nucl: 8, cyto: 4, pero: 2	0
TaDGK2D	nucl: 12, cyto: 2	0
TaDGK3A	nucl: 8, chlo: 2, cyto: 2, mito: 1	0
TaDGK3B	nucl: 9, cyto: 2, chlo: 1, mito: 1	0
TaDGK3D	nucl: 8, cyto: 2, pero: 2, chlo: 1	0
TaDGK5A	chlo: 5, extr: 3, nucl: 1, cyto: 1, mito: 1, plas: 1, vacu: 1	1
TaDGK5B	chlo: 5, cyto: 2, extr: 2, E.R.: 2, nucl: 1, mito: 1	1
TaDGK5D	chlo: 6, extr: 2, E.R.: 2, nucl: 1, cyto: 1, mito: 1	1
TaDGK5A2	chlo: 6, nucl: 3.5, cysk_nucl: 2.5, cyto: 1, plas: 1, extr: 1	1
TaDGK5B2	chlo: 6, nucl: 4.5, cysk_nucl: 3, cyto: 1, extr: 1	1
TaDGK5D2	chlo: 6, nucl: 3.5, cysk_nucl: 2.5, cyto: 1, plas: 1, extr: 1	1
TaDGK6A	cyto: 6, chlo: 4, nucl: 1, mito: 1, pero: 1	0
TaDGK6B	chlo: 5, cyto: 4, cysk: 2, nucl: 1, mito: 1	0
TaDGK6D	cyto: 4, chlo: 3, nucl: 3, cysk: 3	0
TaDGK7B2	cyto: 7, nucl: 3, pero: 2, vacu: 1	0
TaDGK7D2	cyto: 7, nucl: 3, pero: 2, vacu: 1	0
TaDGK6B2	chlo: 5, nucl: 3, mito: 3, cyto: 1, plas: 1	0
TaDGK7A	mito: 8.5, chlo_mito: 6.5, chlo: 3.5	0
TaDGK7B	mito: 9.5, chlo_mito: 6.5, chlo: 2.5	0
TaDGK7D	mito: 8.5, chlo_mito: 6.5, chlo: 3.5	0
a: chlo: chloroplast; cyto: cytoplasm; extr: extracellular; mito: mitochondrion; nucl: nucleus; pero: peroxide; plas: plasma membrane; vacu: vacuole; cysk: cytoskeleton; E.R: endoplasmic reticulum.
