# Supplementary material for: Genomic profiling and expression analysis of the diacylglycerol kinase gene family in heterologous hexaploid wheat
Source: PeerJ. 2021 Dec 14;9:e12480. doi: 10.7717/peerj.12480 (PMC8679913; doi:10.7717/peerj.12480)
Supplement: Supplemental Information 17 [file peerj-09-12480-s017.xlsx]

## Sheet: salt
	0h			0.1h			0.5h			1h			2h			6h			12h			24h
Time	ACTIN	TaDGK2A	TaDGK3A	ACTIN	TaDGK2A	TaDGK3A	ACTIN	TaDGK2A	TaDGK3A	ACTIN	TaDGK2A	TaDGK3A	ACTIN	TaDGK2A	TaDGK3A	ACTIN	TaDGK2A	TaDGK3A	ACTIN	TaDGK2A	TaDGK3A	ACTIN	TaDGK2A	TaDGK3A
Genes	24.566	28.341	27.756	25.687	28.873	28.221	24.546	27.05	26.336	25.762	28.608	25.969	25.747	27.881	27.128	24.846	27.585	26.826	28.356	27.07	29.162	27.098	28.217	27.909
CT Value	24.79	27.619	28.285	24.664	26.856	27.076	25.995	27.285	27.182	24.512	26.2	25.684	23.927	26.303	25.843	24.267	27.162	26.825	26.293	25.61	27.634	25.573	25.916	26.801
	23.712	28.765	28.206	23.301	27.221	27.569	23.039	26.973	25.149	23.54	26.702	24.863	23.448	27.133	24.815	24.192	27.357	25.948	26.357	26.473	27.006	23.77	26.993	27.083
Time	0h			0.1h			0.5h			1h			2h			6h			12h			24h
Genes	ACTIN	TaDGK5B	TaDGK5A2	ACTIN	TaDGK5B	TaDGK5A2	ACTIN	TaDGK5B	TaDGK5A2	ACTIN	TaDGK5B	TaDGK5A2	ACTIN	TaDGK5B	TaDGK5A2	ACTIN	TaDGK5B	TaDGK5A2	ACTIN	TaDGK5B	TaDGK5A2	ACTIN	TaDGK5B	TaDGK5A2
CT Value	25.0764	27.9214	31.3254	25.4827	27.869	32.142	26.5642	28.3762	32.7598	25.2184	26.9082	30.4242	25.1994	27.2745	31.0389	25.1071	27.7986	30.6592	27.3175	26.5216	29.7728	26.4688	26.8395	29.9413
	25.051	28.2699	31.8175	26.5169	28.87	32.8648	25.9628	28.1083	32.235	26.4955	28.4758	32.2345	26.4608	27.8752	31.9566	25.5014	27.737	31.2393	29.0509	27.8389	30.9665	28.811	28.4974	32.3352
	25.5766	29.2989	32.6098	25.2509	28.1805	31.5998	24.9912	27.9234	31.6802	25.7978	27.677	31.285	25.0938	27.4308	30.9432	26.0818	28.067	31.1365	28.0287	27.4411	30.538	25.3805	26.5911	29.7657

## Sheet: drought
Time	0h			0.1h			0.5h			1h			2h			6h			12h			24h
Genes	ACTIN	TaDGK2A	TaDGK3A	ACTIN	TaDGK2A	TaDGK3A	ACTIN	TaDGK2A	TaDGK3A	ACTIN	TaDGK2A	TaDGK3A	ACTIN	TaDGK2A	TaDGK3A	ACTIN	TaDGK2A	TaDGK3A	ACTIN	TaDGK2A	TaDGK3A	ACTIN	TaDGK2A	TaDGK3A
CT Value	24.7465	28.0573	27.8141	24.3604	27.4028	27.1334	26.3716	28.6296	28.0929	26.8271	29.2807	27.1977	25.6308	27.652	26.1636	25.7015	27.5951	25.9908	28.1181	28.0904	26.3615	26.4484	27.8205	25.8972
	23.7023	28.2113	27.0135	24.218	28.0515	27.4233	24.5059	26.8495	25.6703	24.2991	26.6298	25.4388	24.9684	27.3367	25.3572	24.8298	27.4818	25.6956	27.9937	28.3059	26.2739	26.2123	28.1163	25.2422
	22.8138	27.2959	27.3646	23.077	27.714	27.4615	23.3017	27.2141	25.2747	23.8299	27.512	24.7435	23.5621	26.8809	25.017	23.6426	27.1518	25.6029	25.6715	27.1414	25.2414	25.4184	28.0079	26.5733
Time	0h			0.1h			0.5h			1h			2h			6h			12h			24h
Genes	ACTIN	TaDGK5B	TaDGK5A2	ACTIN	TaDGK5B	TaDGK5A2	ACTIN	TaDGK5B	TaDGK5A2	ACTIN	TaDGK5B	TaDGK5A2	ACTIN	TaDGK5B	TaDGK5A2	ACTIN	TaDGK5B	TaDGK5A2	ACTIN	TaDGK5B	TaDGK5A2	ACTIN	TaDGK5B	TaDGK5A2
CT Value	25.245	28.0666	32.2198	25.0679	28.0313	31.7874	26.8704	29.3513	33.5887	27.5034	28.7252	32.75	26.1828	27.797	32.5156	26.1113	27.7001	30.3778	28.3361	28.4668	31.45	26.5166	28.0709	31.2051
	24.5171	27.8627	31.9018	25.1699	28.217	31.8135	24.909	27.2889	31.8576	24.7615	27.0991	31.0011	25.5668	27.3394	31.5069	27.9836	29.2355	32.9249	28.1951	28.399	31.0721	26.6028	28.1431	31.5741
	24.5227	27.7609	31.3531	25.0597	28.1174	31.4279	26.0216	28.994	32.9298	25.6253	27.6002	31.6921	25.4954	27.7994	31.4442	24.8271	27.0793	30.8089	27.4395	27.3859	30.7735	27.0477	28.0016	31.7426

## Sheet: tissue
Tissue	Roots			Stems			Young leaves			Mature leaves			Spike
Genes	ACTIN	TaDGK2A	TaDGK3A	ACTIN	TaDGK2A	TaDGK3A	ACTIN	TaDGK2A	TaDGK3A	ACTIN	TaDGK2A	TaDGK3A	ACTIN	TaDGK2A	TaDGK3A
CT value	24.3081	25.2251	26.951	23.3857	25.569	22.9598	23.8953	26.4107	26.9384	22.1775	25.7929	26.6992	22.7379	23.7068	22.4816
	24.5718	25.6584	27.0341	23.4377	25.7503	23.6693	22.7471	26.1833	26.8968	23.2283	26.2244	26.7419	22.4082	23.6421	23.2284
	24.1641	25.0439	26.5804	23.1144	25.0896	22.2362	23.3909	26.7256	27.0332	24.2431	28.2769	28.646	22.4082	23.6421	23.2284
Tissue	Roots			Stems			Young leaves			Mature leaves			Spike
Genes	ACTIN	TaDGK4B	TaDGK5A	ACTIN	TaDGK4B	TaDGK5A	ACTIN	TaDGK4B	TaDGK5A	ACTIN	TaDGK4B	TaDGK5A	ACTIN	TaDGK4B	TaDGK5A
CT value	23.9243	25.9308	29.9209	23.621	25.9499	29.9149	22.8836	25.5003	29.7297	22.8586	24.9188	28.6087	24.2198	26.1089	30.255
	22.7741	25.6186	29.8007	23.4697	26.5506	31.1746	22.6156	25.934	29.3208	21.8935	23.5021	27.5647	22.689	24.9874	29.3479
	22.9488	26.7996	30.321	24.9445	27.9251	31.2353	21.9852	27.5928	32.1955	21.5702	26.4869	31.0704	21.6876	27.4719	31.9311
Tissue		Roots			Stems			Young leaves			Mature leaves			spike
Genes	ACTIN	TaDGK1	TaDGK5	ACTIN	TaDGK1	TaDGK5	ACTIN	TaDGK1	TaDGK5	ACTIN	TaDGK1	TaDGK5	ACTIN	TaDGK1	TaDGK5
CT value	24.5534	26.4078	23.248	23.4564	27.0937	23.2091	22.4851	27.5446	25.5839	23.2853	27.6352	25.0911	22.02	23.5289	23.0713
	24.4719	26.0708	23.7479	23.9208	26.6153	23.3132	23.091	27.38	25.2346	23.0688	27.6803	25.0221	22.385	23.2085	22.5479
	24.6968	26.9759	24.255	23.1002	26.4832	23.6555	22.5556	27.6164	25.3176	23.5612	27.6596	24.7755	22.7974	23.0757	22.8586
Tissue		Roots			Stems			Young leaves			Mature leaves			spike
Genes	ACTIN	TaDGK6	TaDGK6B2	ACTIN	TaDGK6	TaDGK6B2	ACTIN	TaDGK6	TaDGK6B2	ACTIN	TaDGK6	TaDGK6B2	ACTIN	TaDGK6	TaDGK6B2																							SD
CT value	24.2724	22.5821	31.8953	23.0834	22.4352	33.2274	23.7235	23.3567	30.4167	24.0749	23.8639	30.9257	22.4491	22.042	29.0528
	24.1713	22.8659	32.4179	22.9394	22.0046	32.2091	23.3827	23.8315	31.3406	24.7493	24.1771	30.6185	22.1513	22.4374	28.0424
	23.9969	22.0658	32.8132	23.01	21.6807	31.2487	23.0907	23.4565	32.0442	23.9553	24.5766	30.3883	22.6537	21.7674	27.8146
Tissue		Roots			Stems			Young leaves			Mature leaves			spike
Genes	ACTIN	TaDGK7-1	TaDGK7-2	ACTIN	TaDGK7-1	TaDGK7-2	ACTIN	TaDGK7-1	TaDGK7-2	ACTIN	TaDGK7-1	TaDGK7-2	ACTIN	TaDGK7-1	TaDGK7-2
CT value	22.3171	24.3372	36.2421	23.6674	25.217	33.808	22.0781	26.7269	34.991	21.5305	25.7484	32.2153	22.8555	24.9417	27.7827
	22.9692	24.8555	35.903	23.1539	25.8401	33.8759	22.8949	26.4391	34.58	22.1908	25.8642	32.4832	22.3667	25.2471	27.2907
	22.9094	25.0751	35.1048	23.5769	25.7146	33.0066	23.0785	26.6893	34.3479	21.752	25.0149	32.7771	22.7035	25.692	26.9493
